# Supplementary material for: DNA Fingerprint Analysis of Raman Spectra Captures Global Genomic Alterations in Imatinib-Resistant Chronic Myeloid Leukemia: A Potential Single Assay for Screening Imatinib Resistance
Source: MDPI journal article supplement (doi:10.3390/cells10102506), 2021-09-22
Supplement: s1 [file s1]

Sample Information

Green Sample : Research K562-S  
Array ID : 252192435816\_2\_2  
Global Display Name : 252192435816\_2\_2  
Polarity : -1  
Red Sample : Reference DNA  
DerivativeOfLogRatioSD : 0.386728  
Intermediate Report by : DATASYSTEM\admin

Genome View (Amp/Del)

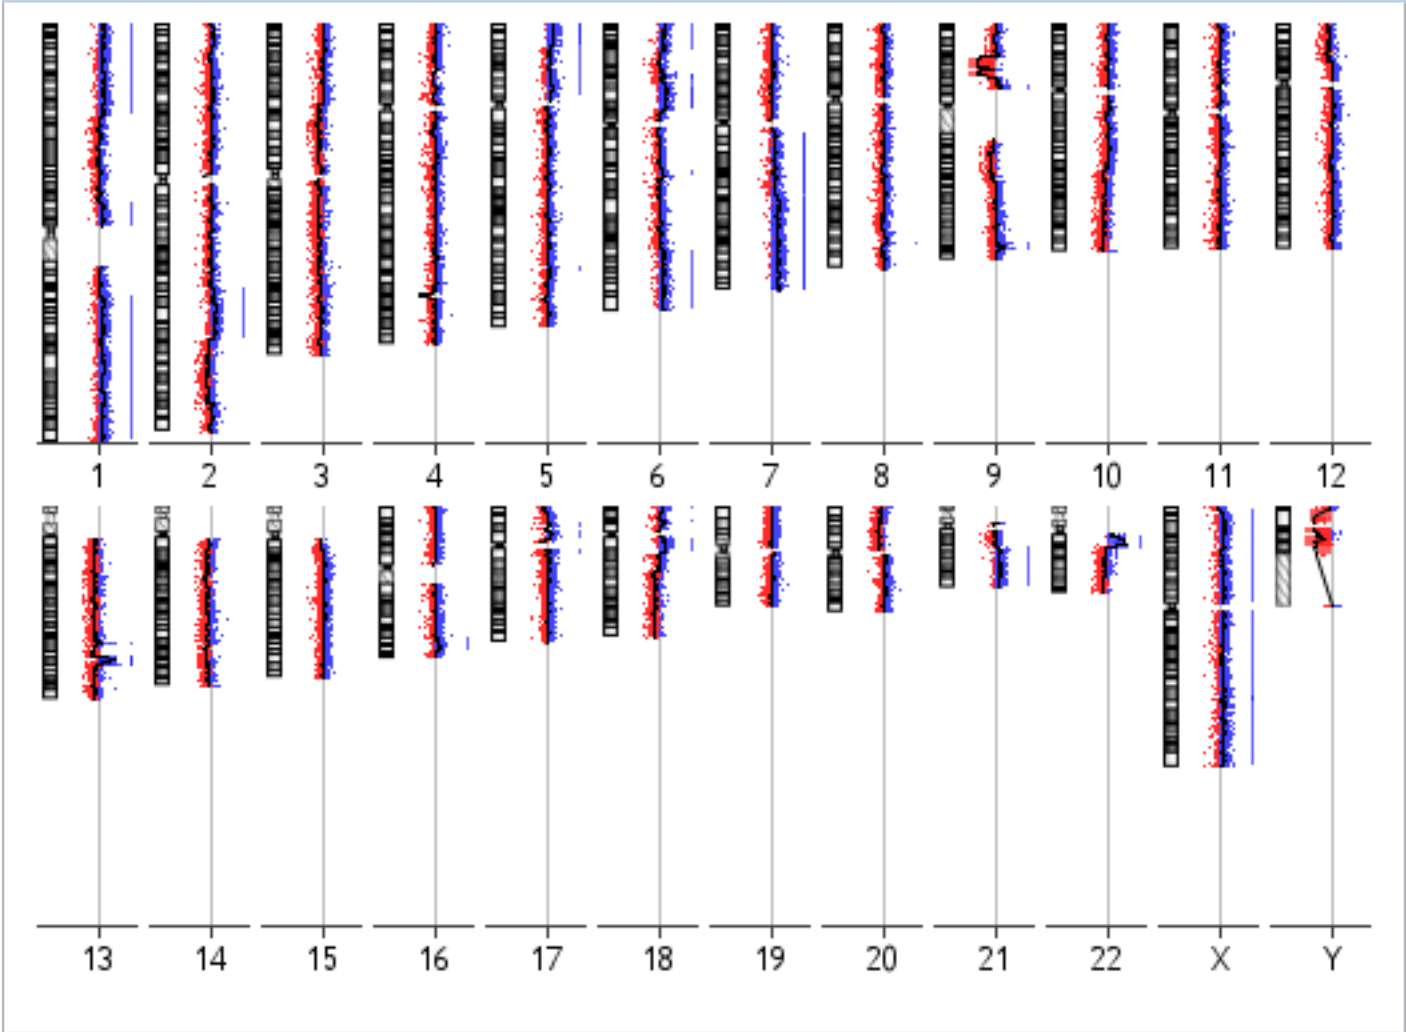

This is an intermediate report and not a final signed off report

## Chromosome Views (Amp/Del)

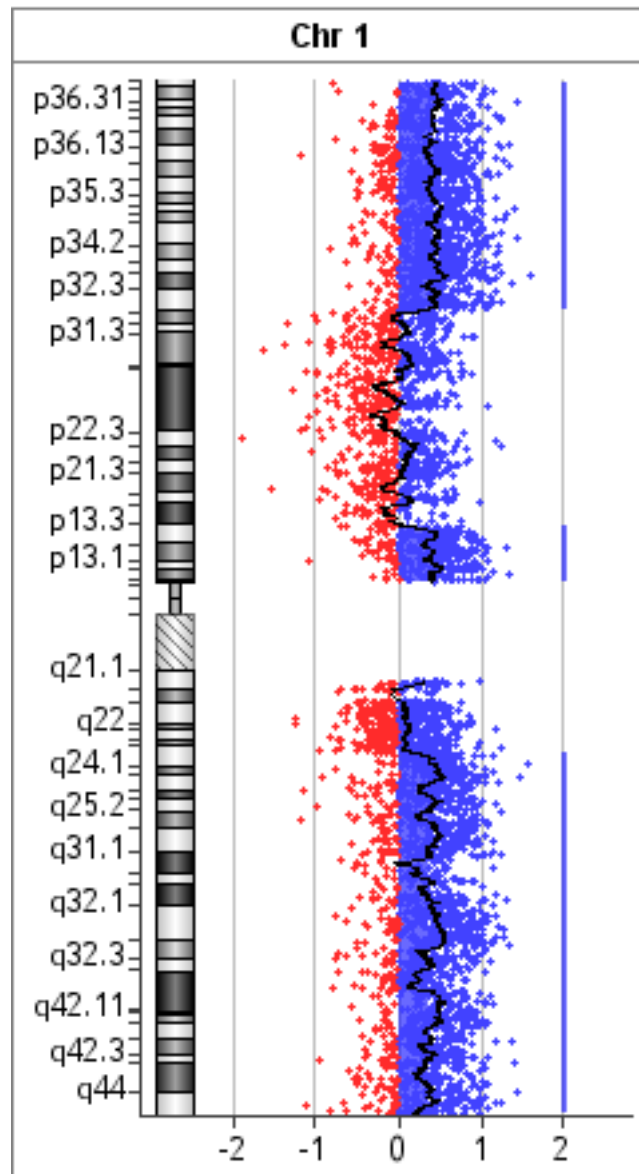

This is an intermediate report and not a final signed off report

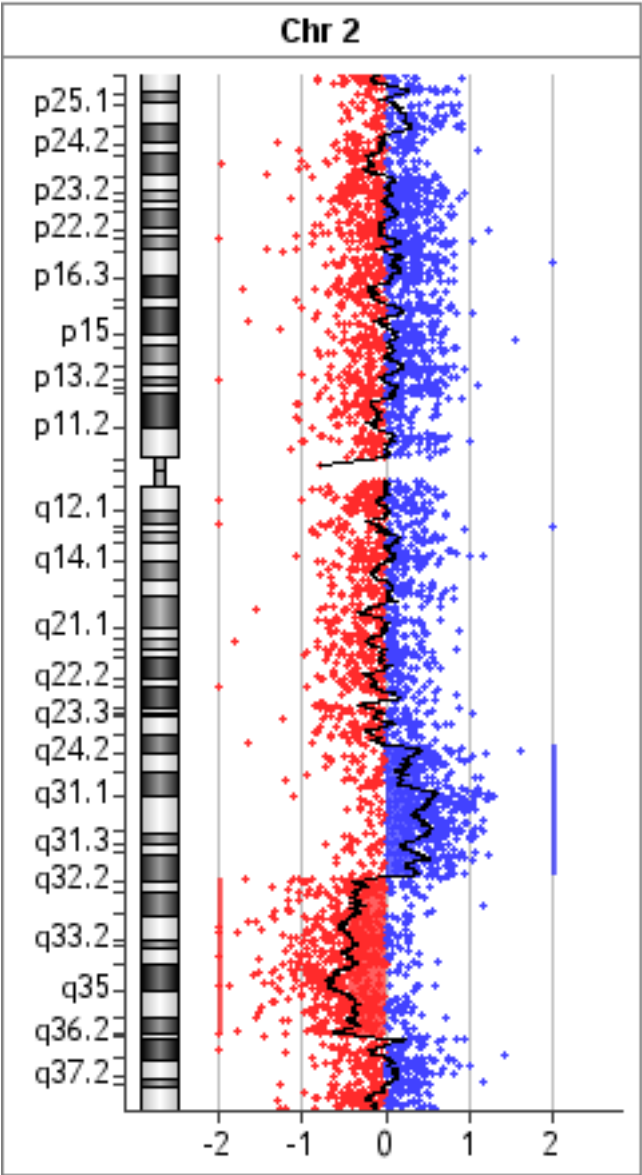

This is an intermediate report and not a final signed off report

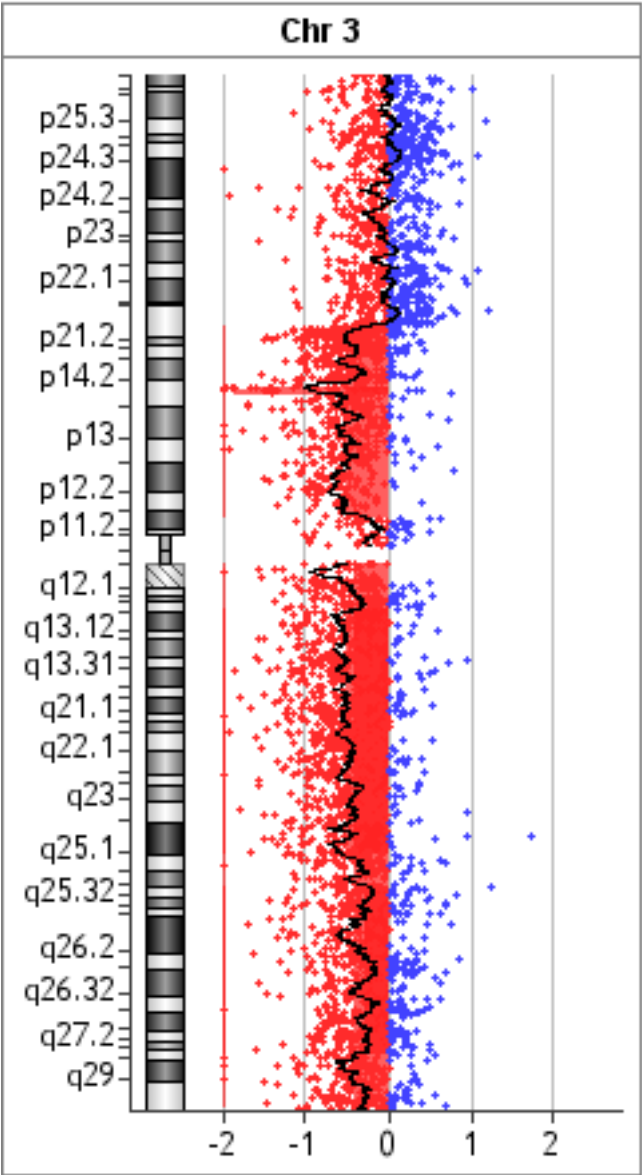

This is an intermediate report and not a final signed off report

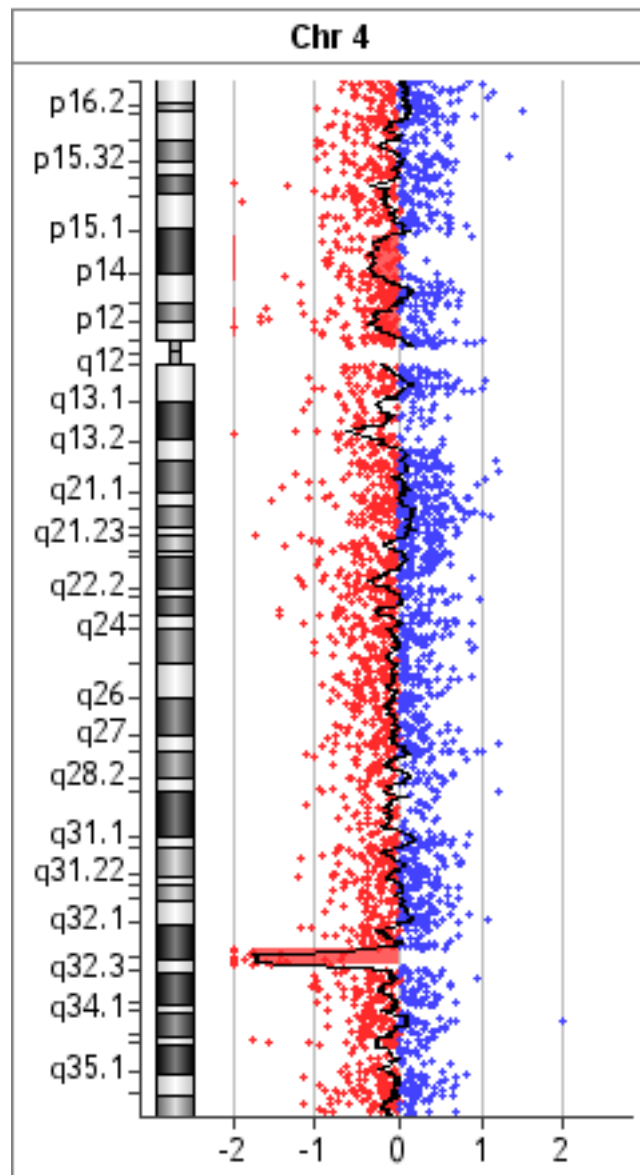

This is an intermediate report and not a final signed off report

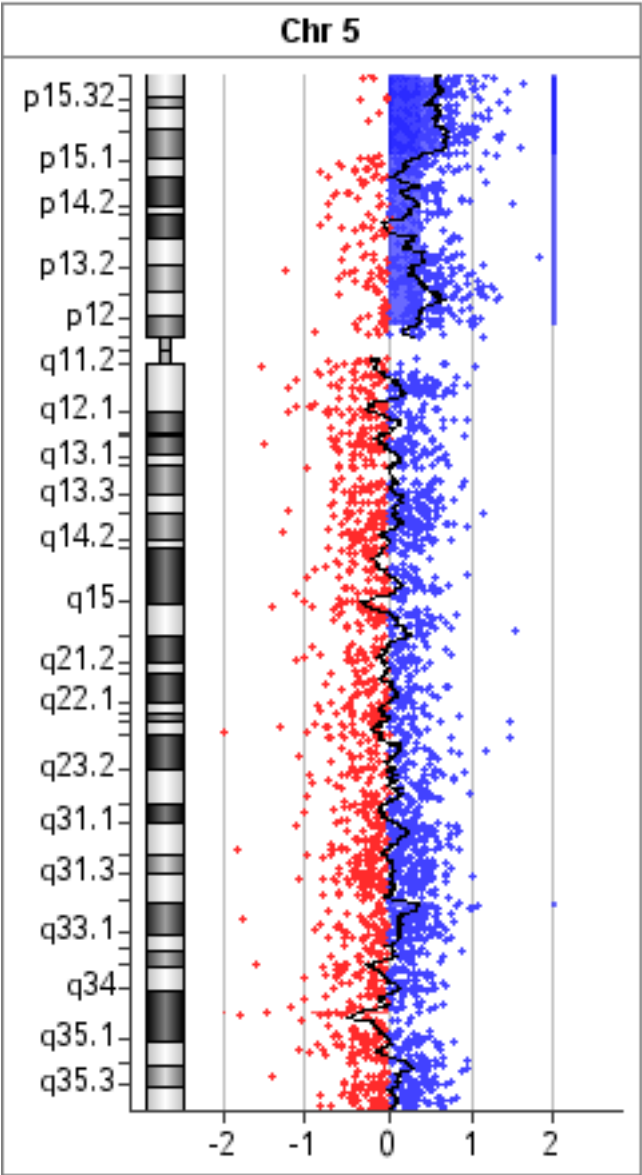

This is an intermediate report and not a final signed off report

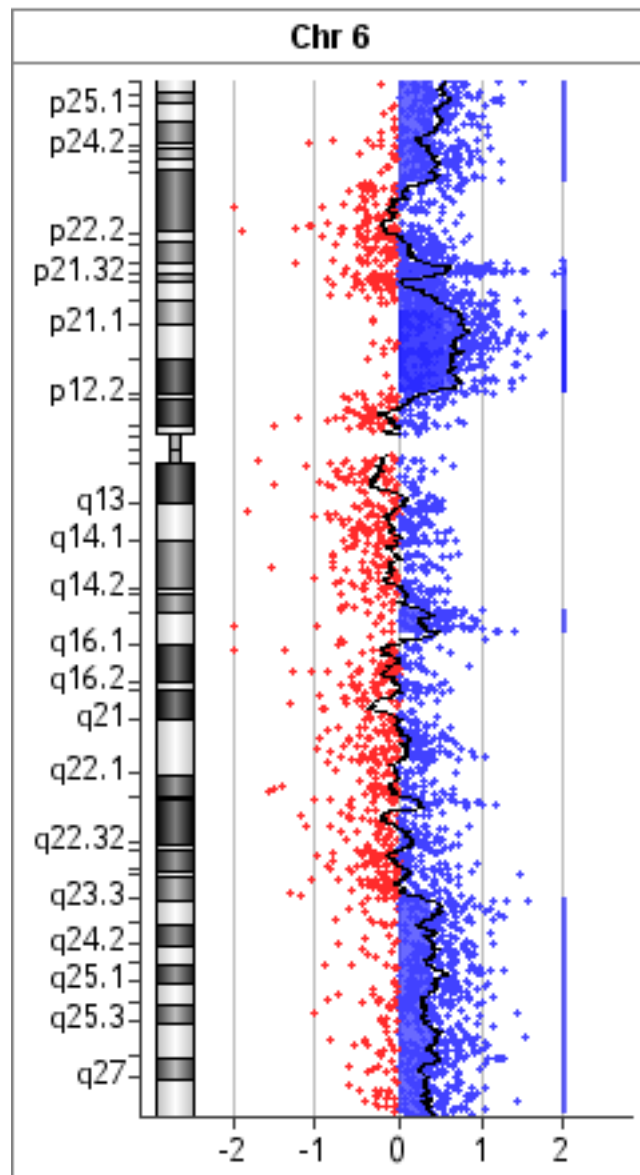

This is an intermediate report and not a final signed off report

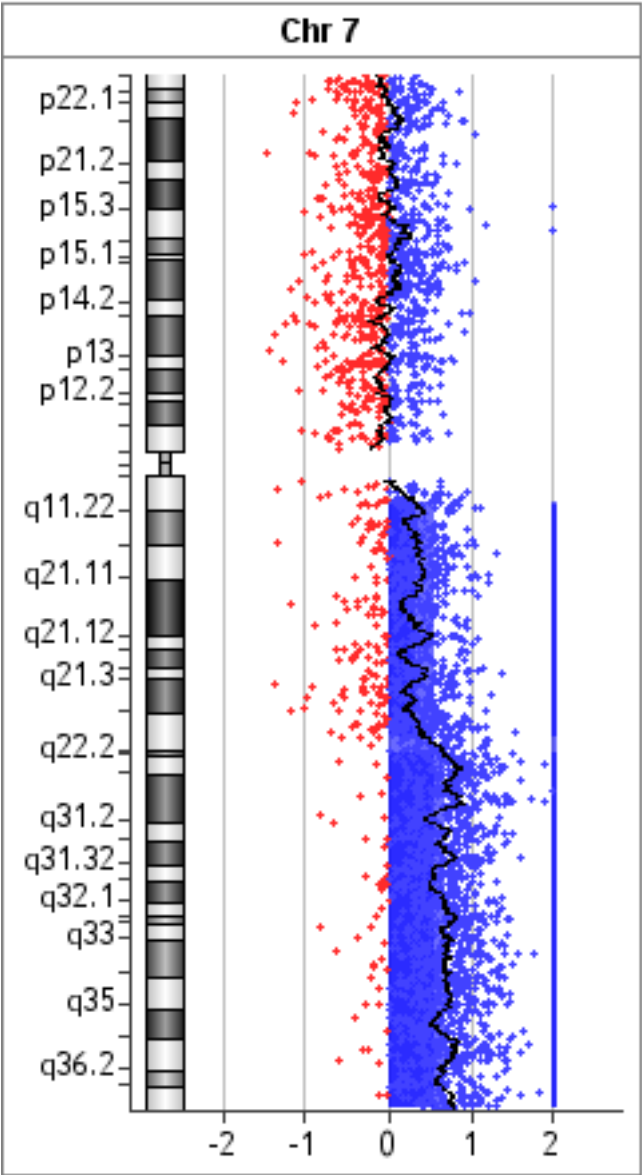

This is an intermediate report and not a final signed off report



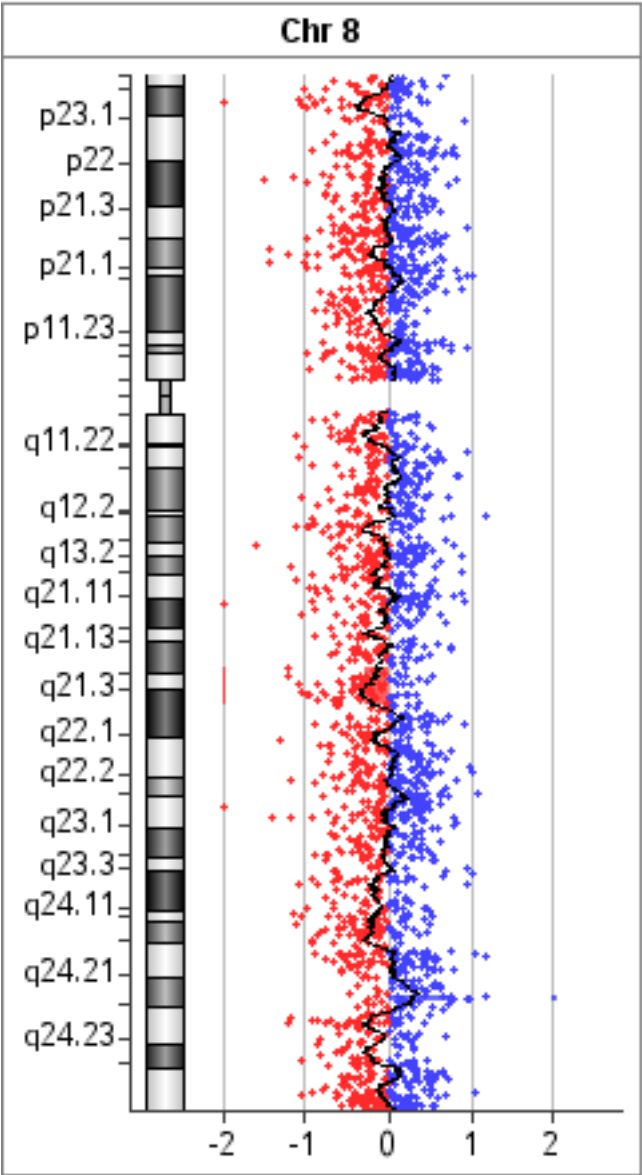

This is an intermediate report and not a final signed off report

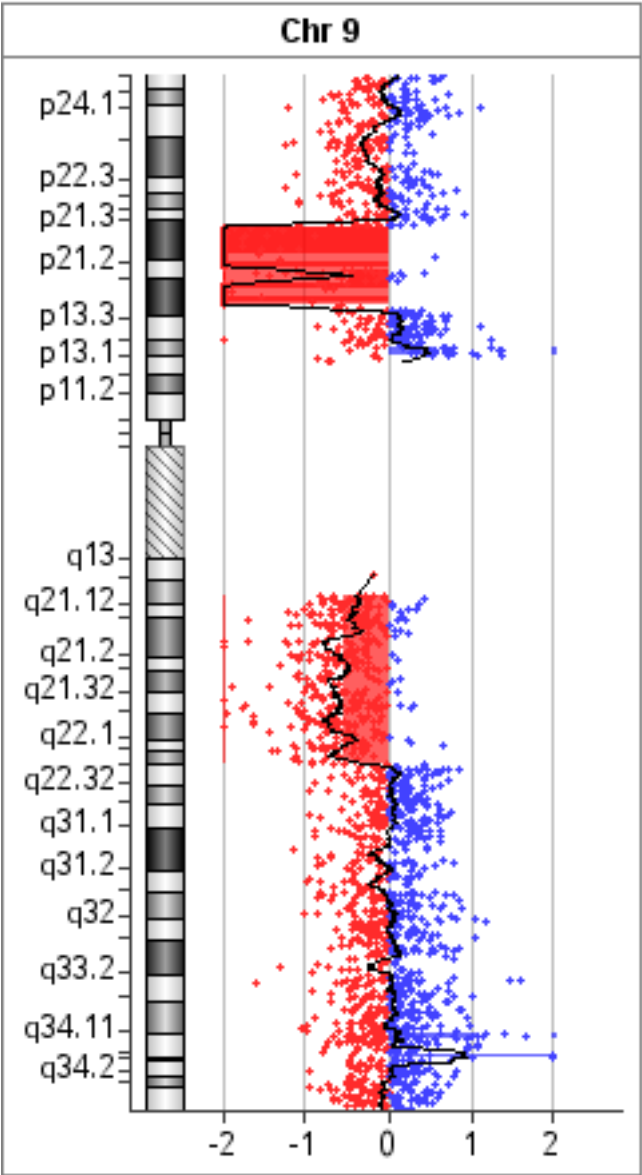

This is an intermediate report and not a final signed off report

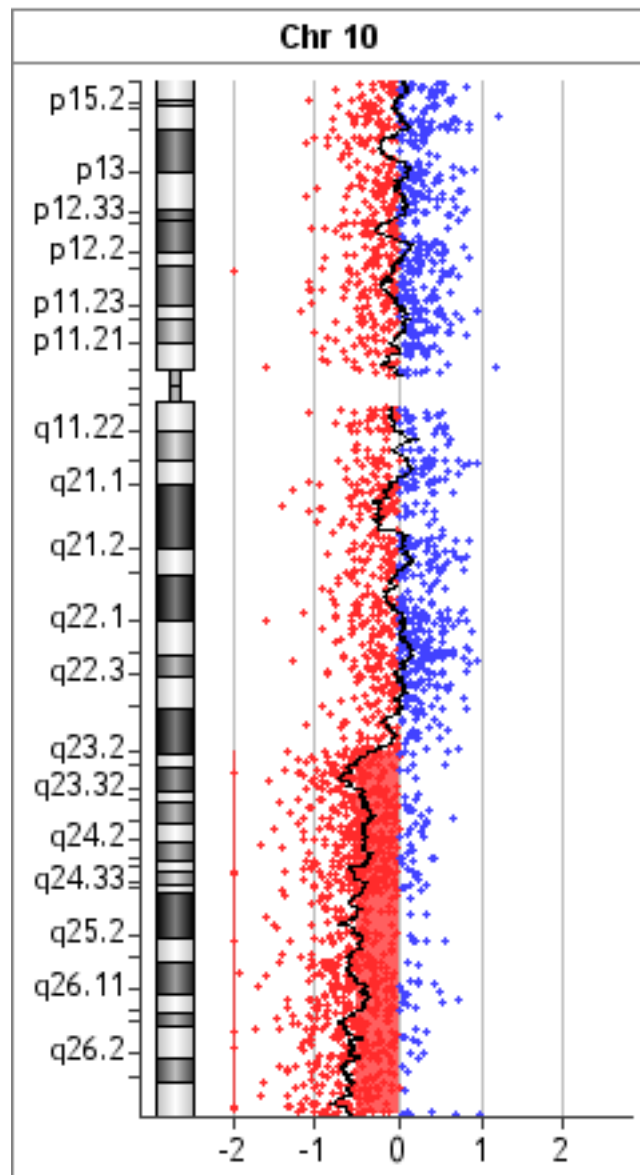

This is an intermediate report and not a final signed off report

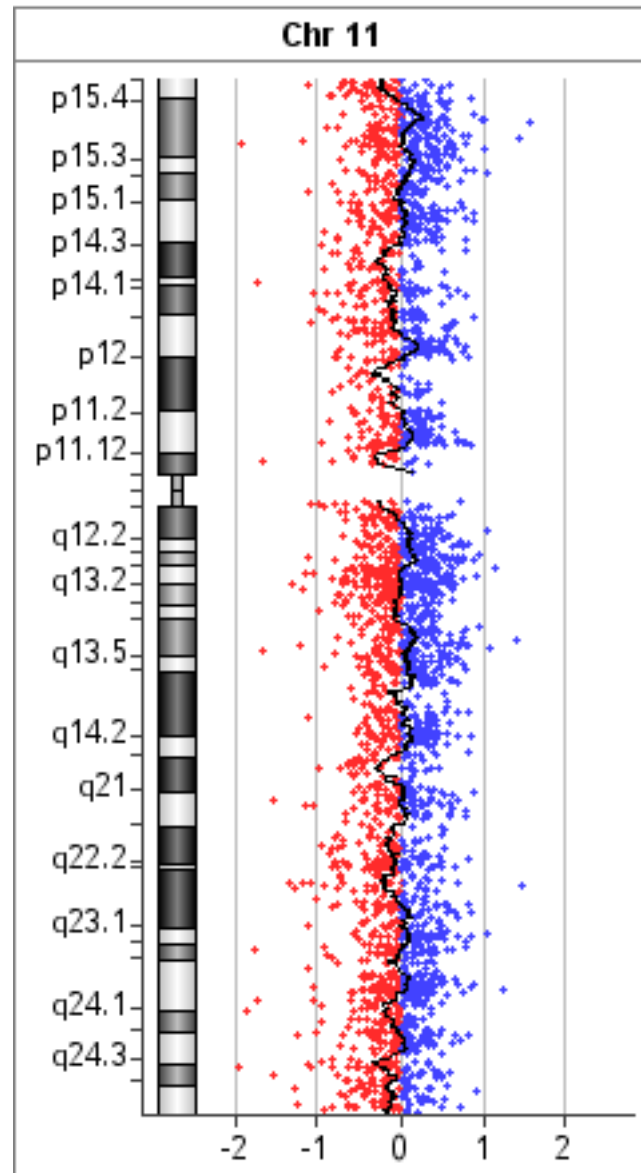

This is an intermediate report and not a final signed off report

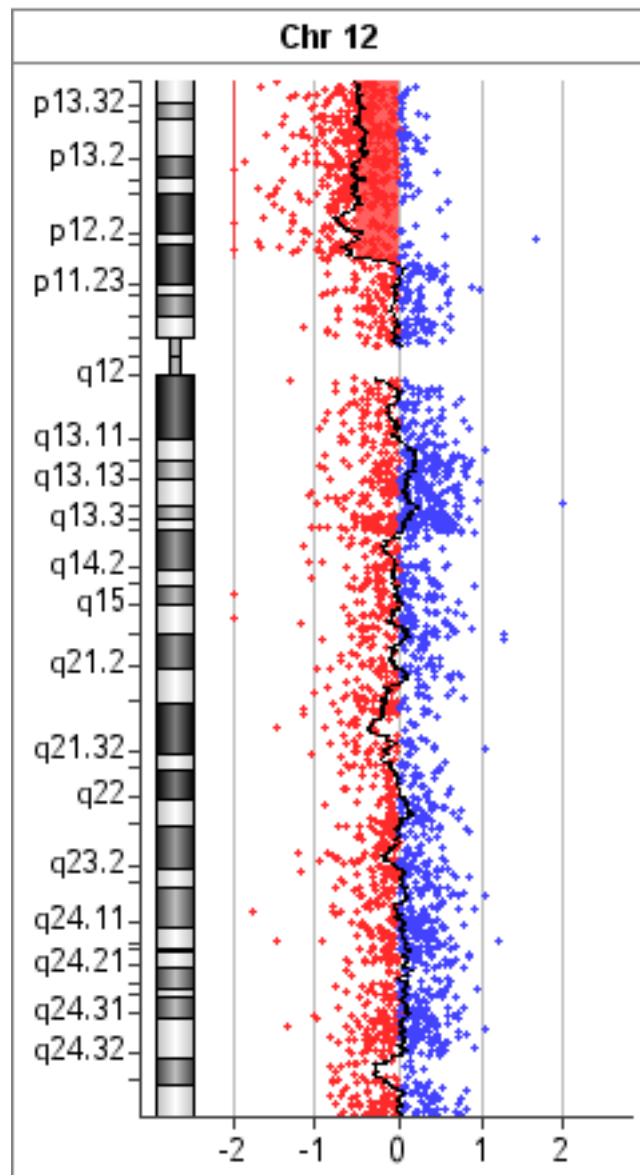

This is an intermediate report and not a final signed off report

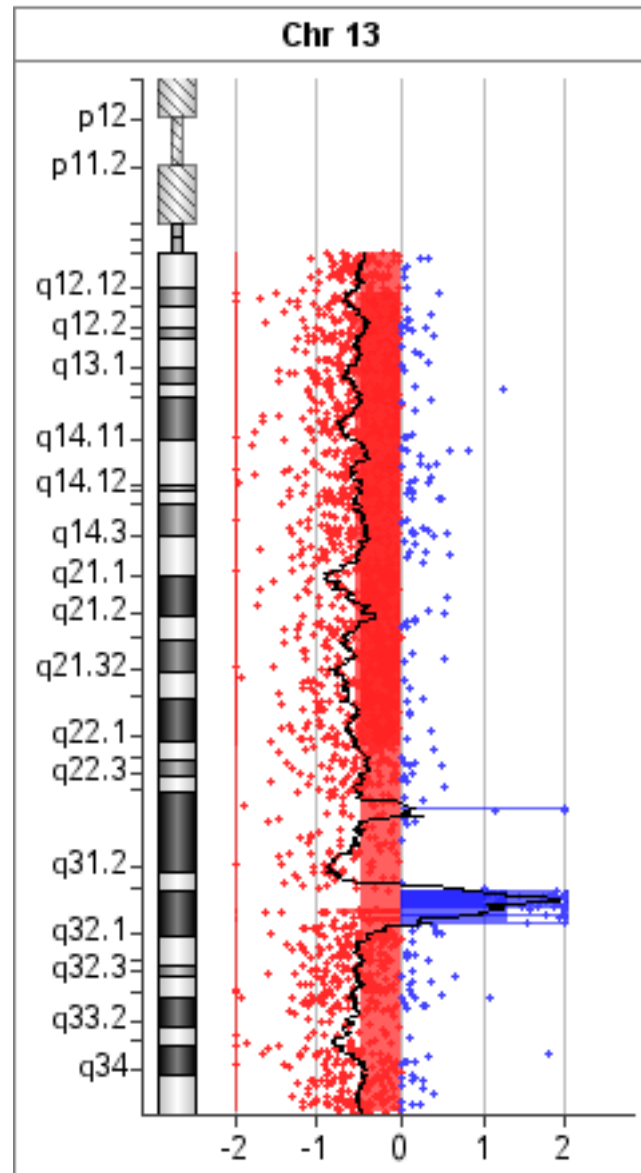

This is an intermediate report and not a final signed off report

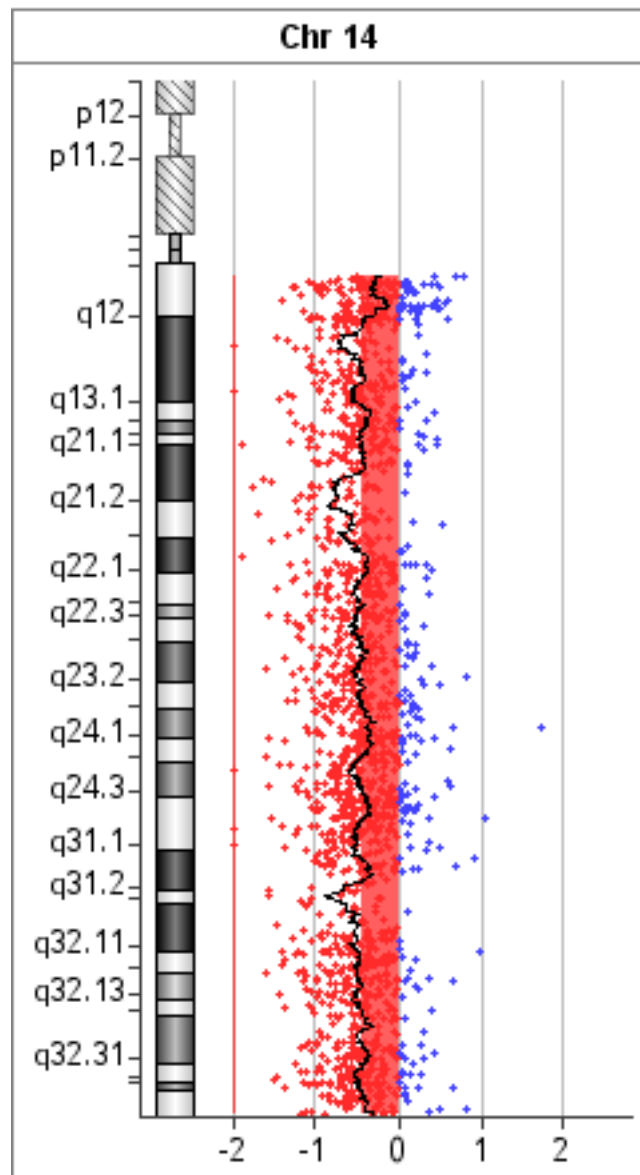

This is an intermediate report and not a final signed off report

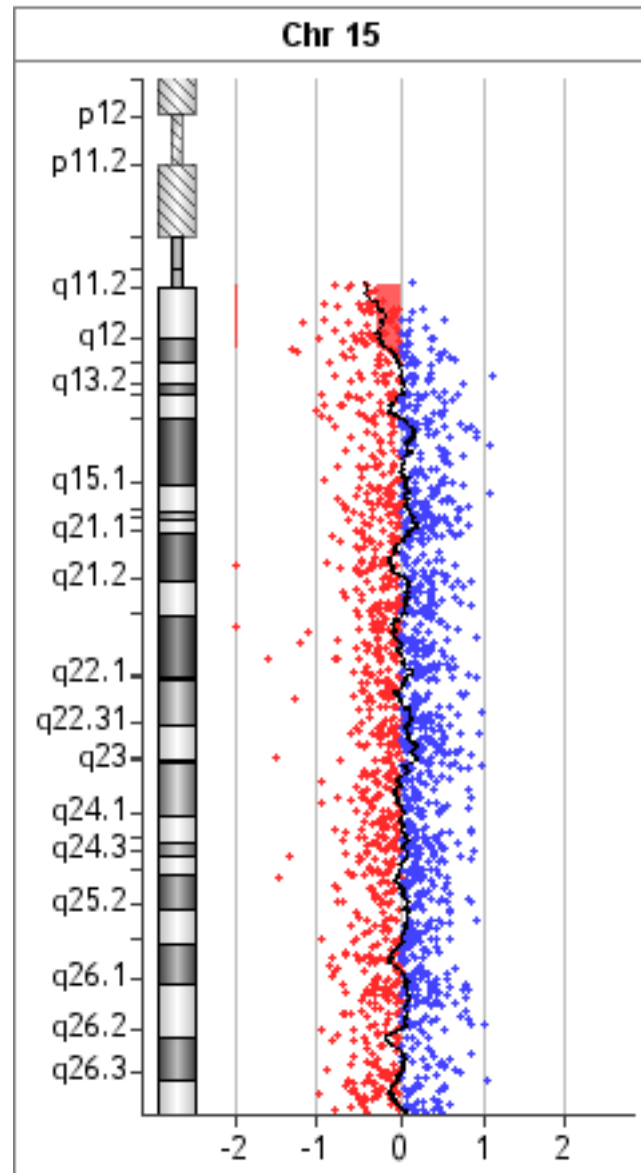

This is an intermediate report and not a final signed off report



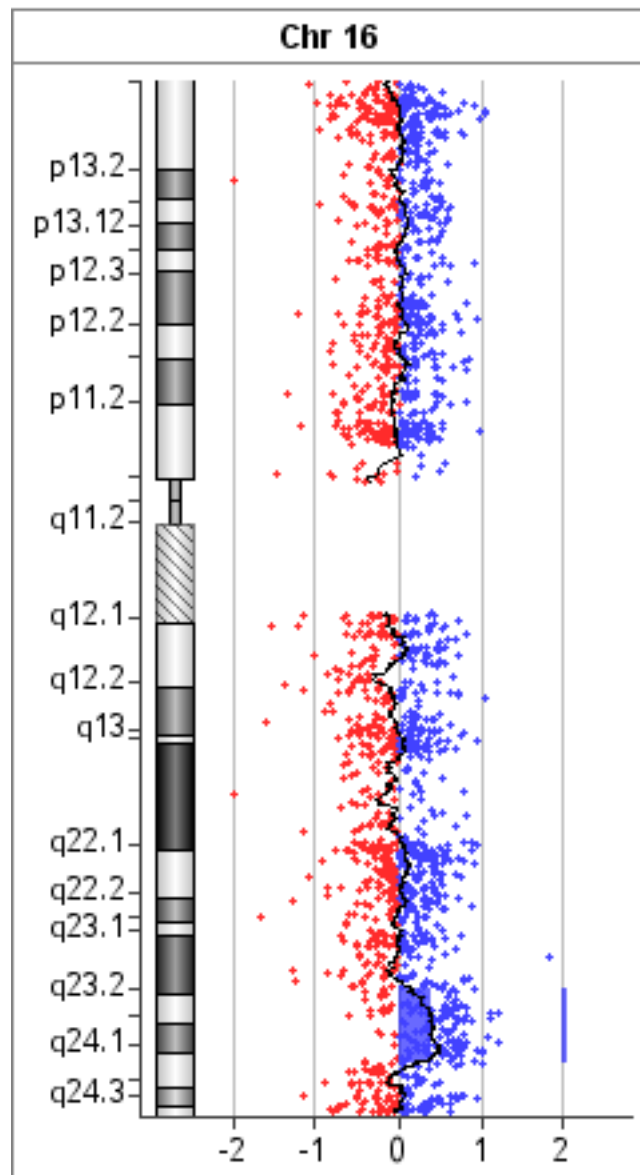

This is an intermediate report and not a final signed off report

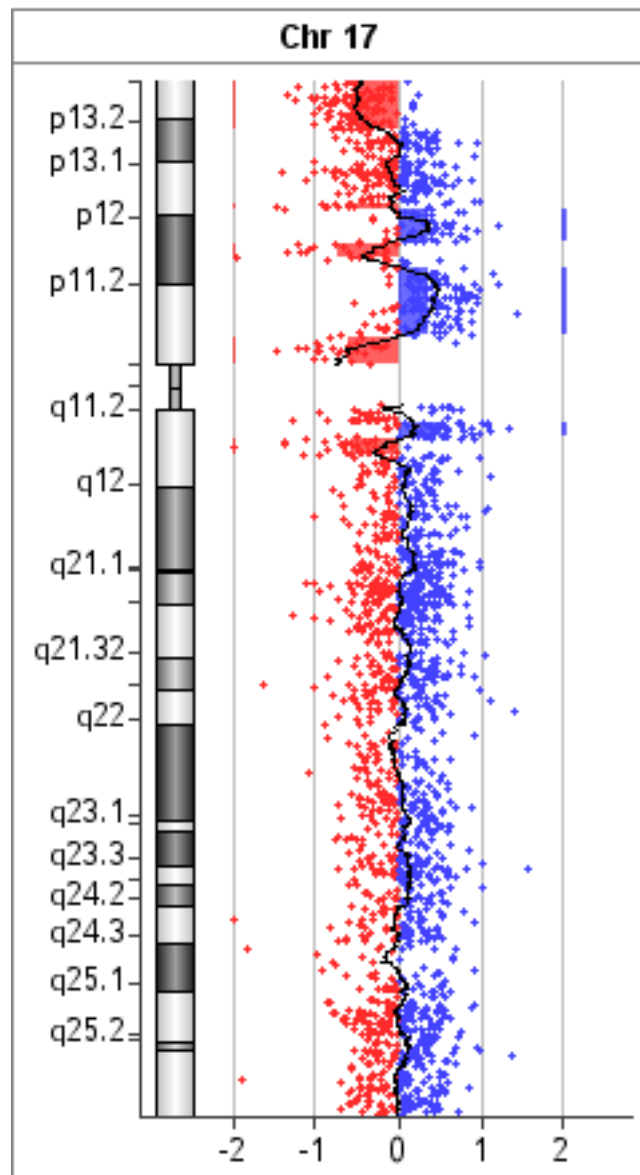

This is an intermediate report and not a final signed off report

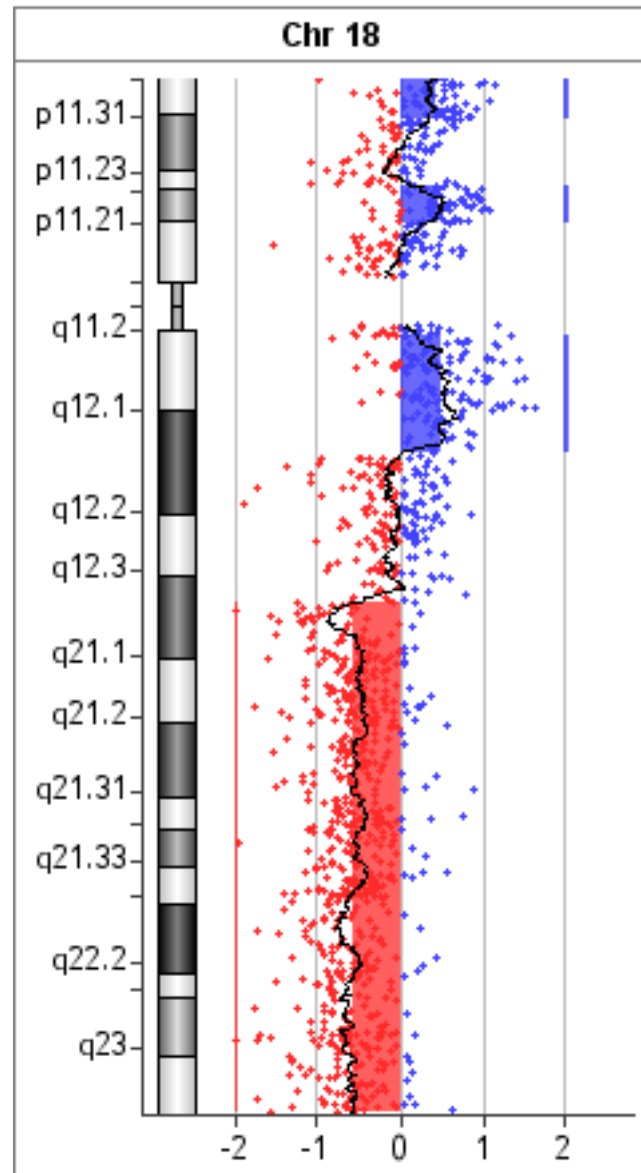

This is an intermediate report and not a final signed off report

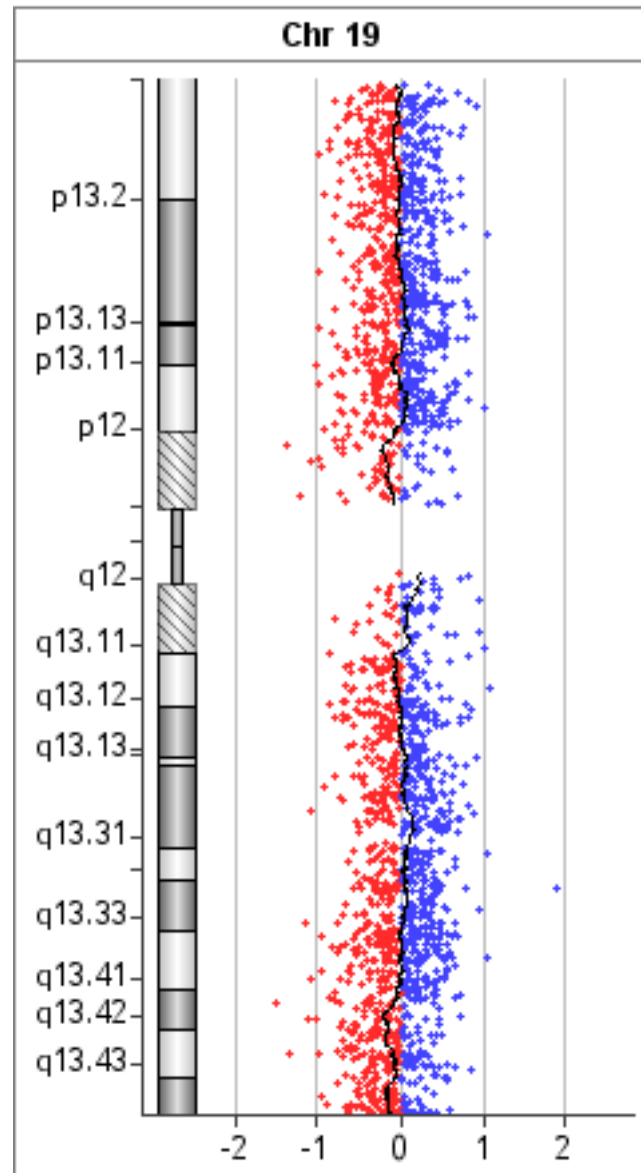

This is an intermediate report and not a final signed off report

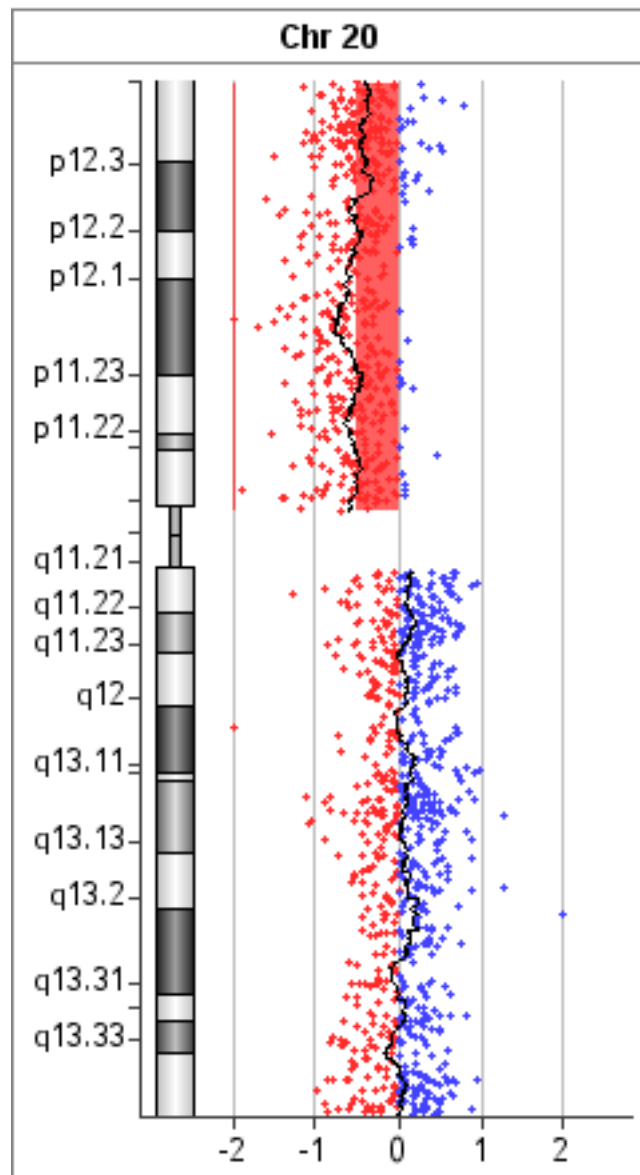

This is an intermediate report and not a final signed off report

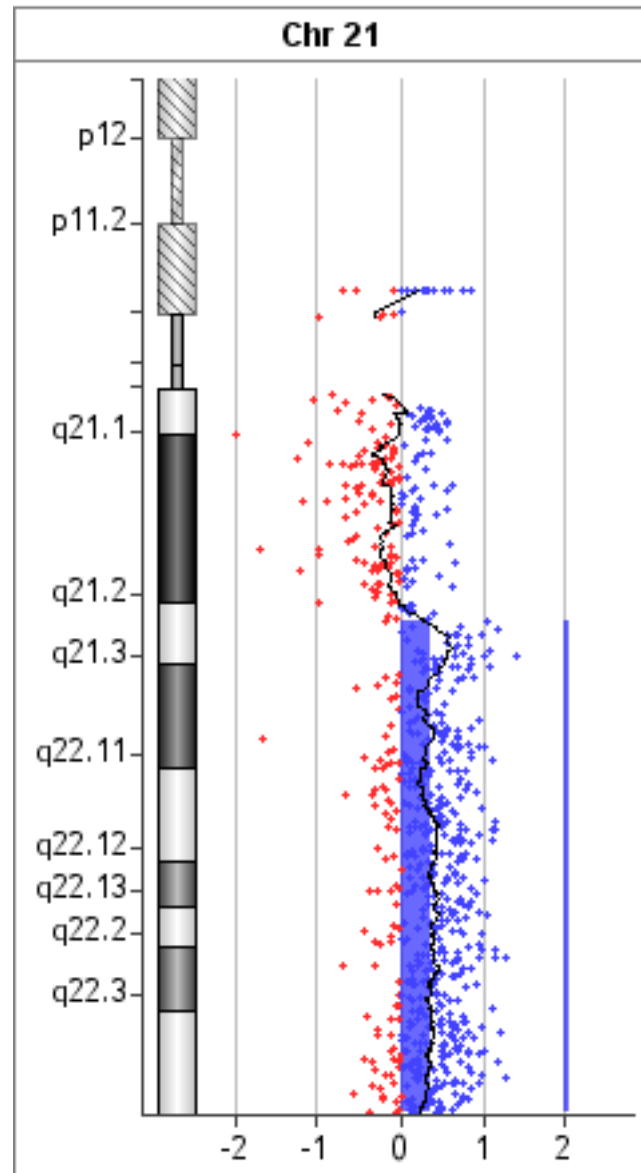

This is an intermediate report and not a final signed off report

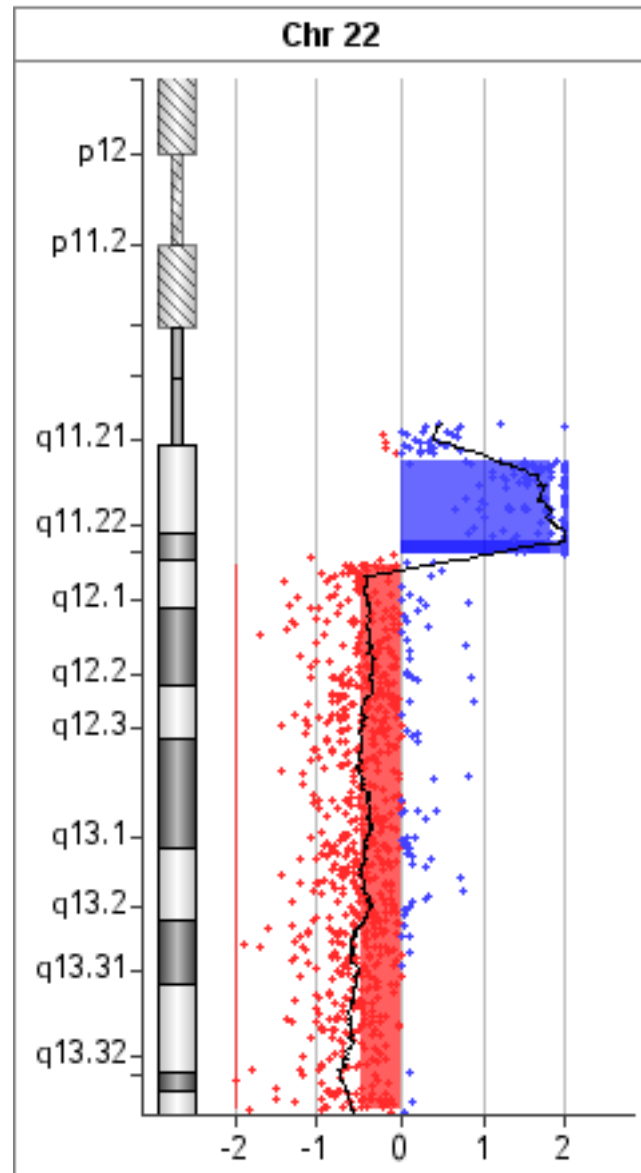

This is an intermediate report and not a final signed off report

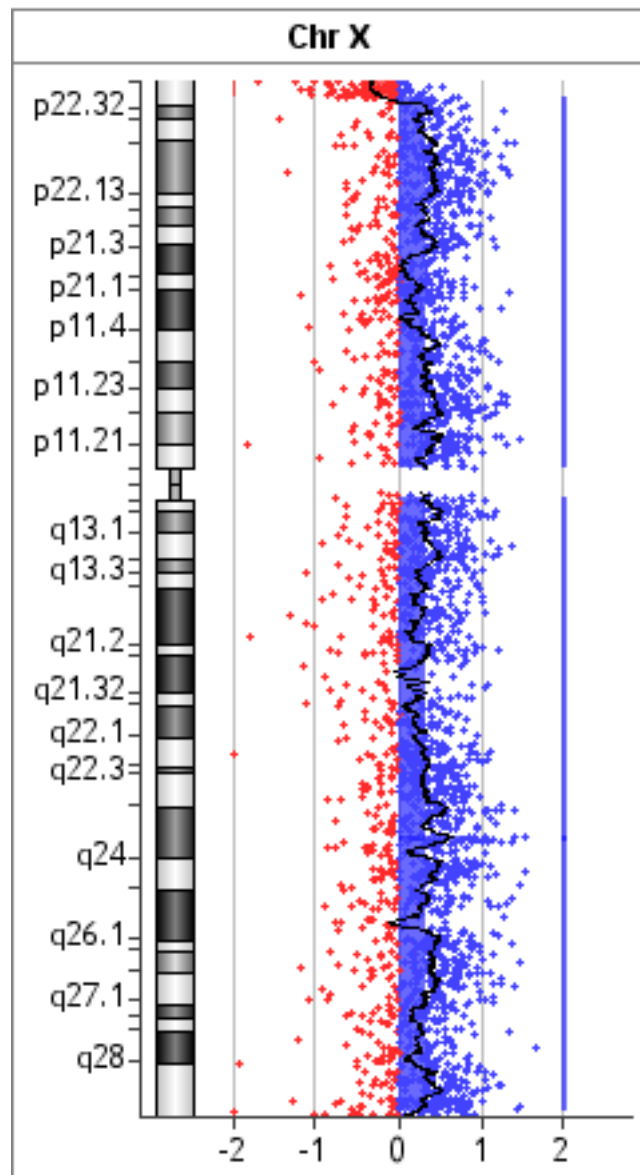

This is an intermediate report and not a final signed off report



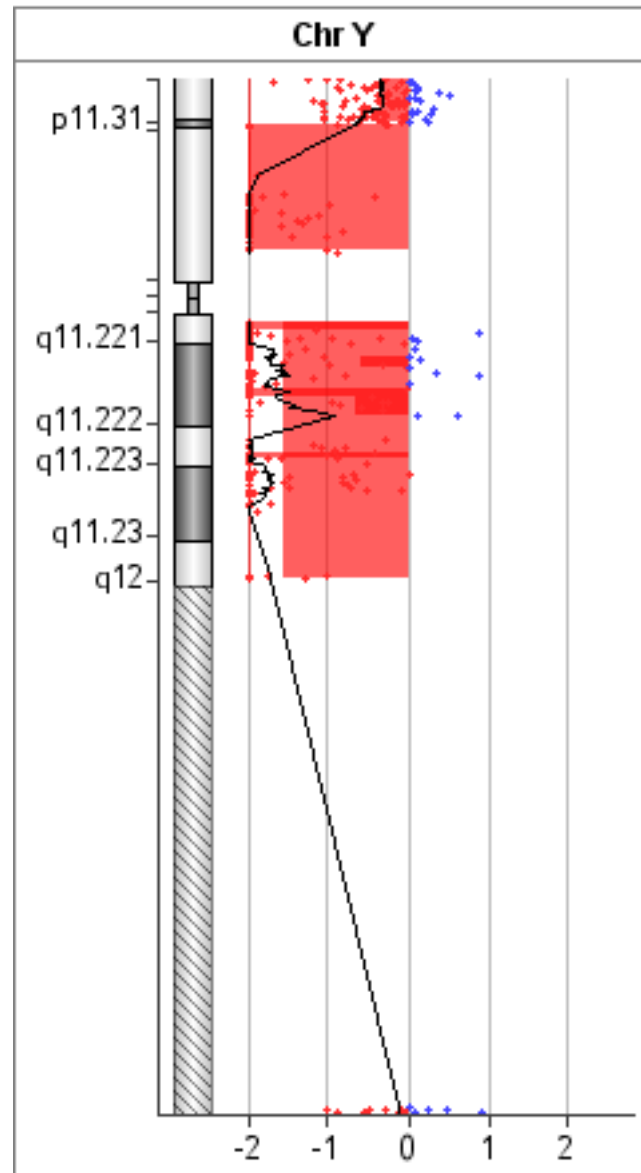

This is an intermediate report and not a final signed off report

## Amp/Gain/Loss/Del Intervals Table

| Chr  | Start-Stop(bp)      | Size(kb) | Cytoband       | #Probes | Amp/Gain/<br>Loss/Del | P-value   | Annotations                    |
|------|---------------------|----------|----------------|---------|-----------------------|-----------|--------------------------------|
| chr1 | 852863-55252418     | 54,400   | p36.33 - p32.3 | 1281    | 0.420767              | 4.90E-324 | FLJ39609, SAMD11, NOC2L...     |
| chr1 | 107867286-121281170 | 13,414   | p13.3 - p11.2  | 305     | 0.396483              | 8.00E-78  | NTNG1, VAV3, SLC25A24...       |
| chr1 | 162299940-249151859 | 86,852   | q23.3 - q44    | 1737    | 0.377019              | 4.90E-324 | NOS1AP, MIR556, C1orf111...    |
| chr2 | 157511681-188546067 | 31,034   | q24.1 - q32.1  | 576     | 0.363323              | 9.49E-122 | GALNT5, ERMN, CYTIP...         |
| chr2 | 189068304-225781442 | 36,713   | q32.1 - q36.2  | 733     | -0.439867             | 3.82E-224 | GULP1, MIR561, DIRC1...        |
| chr3 | 48371494-84777471   | 36,406   | p21.31 - p12.1 | 705     | -0.516846             | 2.74E-298 | FBXW12, PLXNB1, CCDC51...      |
| chr3 | 59764652-60088412   | 324      | p14.2          | 11      | -1.620060             | 8.66E-23  | FHIT                           |
| chr3 | 60629805-60728584   | 99       | p14.2          | 3       | -1.865281             | 4.53E-10  | FHIT                           |
| chr3 | 93580736-197840339  | 104,260  | q11.1 - q29    | 1900    | -0.415205             | 4.90E-324 | PROS1, ARL13B, STX19...        |
| chr3 | 102332721-149307763 | 46,975   | q12.3 - q25.1  | 866     | -0.515204             | 1.47E-15  | MIR548A3, ALCAM, CBLB...       |
| chr3 | 155161736-187716648 | 32,555   | q25.31 - q27.3 | 589     | -0.280233             | 6.93E-19  | PLCH1, C3orf33, SLC33A1...     |
| chr4 | 28828344-37236650   | 8,408    | p15.1 - p14    | 68      | -0.299802             | 1.74E-11  | PCDH7, ARAP2, DTHD1            |
| chr4 | 41956926-47466088   | 5,509    | p13 - p12      | 82      | -0.250742             | 5.90E-10  | TMEM33, DCAF4L1, SLC30A9...    |
| chr4 | 160517264-163435909 | 2,919    | q32.1 - q32.2  | 30      | -1.715949             | 6.40E-129 | FSTL5                          |
| chr5 | 151737-44268593     | 44,117   | p15.33 - p12   | 630     | 0.396707              | 1.69E-158 | PLEKHG4B, LRRIC14B, CCDC127... |
| chr5 | 871638-14011580     | 13,140   | p15.33 - p15.2 | 175     | 0.613636              | 5.32E-15  | BRD9, TRIP13, NKD2...          |
| chr5 | 144978575-145904094 | 926      | q32            | 22      | 0.511440              | 5.20E-11  | PRELID2, GRXCR2, SH3RF2...     |
| chr5 | 163813707-164485709 | 672      | q34            | 8       | -0.905327             | 2.64E-12  |                                |
| chr6 | 170426-16759504     | 16,589   | p25.3 - p22.3  | 263     | 0.440910              | 4.92E-83  | DUSP22, IRF4, EXOC2...         |
| chr6 | 30271385-51732931   | 21,462   | p22.1 - p12.3  | 582     | 0.538516              | 1.90E-268 | HCG18, TRIM39, TRIM39-RPP21... |
| chr6 | 31548354-31826999   | 279      | p21.33         | 31      | 0.987129              | 8.60E-12  | LTB, LST1, NCR3...             |

This is an intermediate report and not a final signed off report

| Chr   | Start-Stop(bp)      | Size(kb) | Cytoband        | #Probes | Amp/Gain/<br>Loss/Del | P-value   | Annotations                     |
|-------|---------------------|----------|-----------------|---------|-----------------------|-----------|---------------------------------|
| chr6  | 38252496-51732931   | 13,480   | p21.2 - p12.3   | 285     | 0.705417              | 1.59E-14  | BTBD9, GLO1, DNAH8...           |
| chr6  | 87429974-91598727   | 4,169    | q14.3 - q15     | 90      | 0.366184              | 4.58E-21  | HTR1E, CGA, ZNF292...           |
| chr6  | 135238540-170890108 | 35,652   | q23.3 - q27     | 627     | 0.381918              | 1.69E-146 | ALDH8A1, HBS1L, MIR3662...      |
| chr7  | 65972673-159088636  | 93,116   | q11.21 - q36.3  | 2004    | 0.552672              | 4.90E-324 | LOC493754, KCTD7, RABGEF1...    |
| chr7  | 66096058-102114142  | 36,018   | q11.21 - q22.1  | 697     | 0.314866              | 1.95E-64  | KCTD7, RABGEF1, LOC729156...    |
| chr7  | 104179715-159088636 | 54,909   | q22.2 - q36.3   | 1265    | 0.681932              | 1.76E-35  | LHFPL3, LOC645591, LOC723809... |
| chr8  | 83898547-89180109   | 5,282    | q21.13 - q21.3  | 80      | -0.263830             | 1.09E-10  | RALYL, LRRCC1, E2F5...          |
| chr8  | 130425357-130788501 | 363      | q24.21          | 9       | 0.747999              | 7.56E-10  | GSDMC                           |
| chr9  | 20778714-31510599   | 10,732   | p21.3 - p21.1   | 152     | -2.081331             | 4.90E-324 | KIAA1797, PTPLAD2, IFNB1...     |
| chr9  | 21036673-23690332   | 2,654    | p21.3           | 51      | -3.194464             | 1.36E-65  | IFNB1, IFNW1, IFNA21...         |
| chr9  | 23933298-24449398   | 516      | p21.3           | 4       | -3.744545             | 2.42E-12  |                                 |
| chr9  | 25583028-26465048   | 882      | p21.3 - p21.2   | 8       | -3.580202             | 1.42E-19  | TUSC1                           |
| chr9  | 26649384-28519628   | 1,870    | p21.2 - p21.1   | 37      | -0.453681             | 4.00E-157 | C9orf82, PLAA, IFT74...         |
| chr9  | 28606661-29137041   | 530      | p21.1           | 10      | -3.609632             | 5.55E-24  | LINGO2, MIR876, MIR873          |
| chr9  | 30520898-31263003   | 742      | p21.1           | 10      | -3.121819             | 1.03E-13  |                                 |
| chr9  | 37129266-38403251   | 1,274    | p13.2 - p13.1   | 31      | 0.593956              | 2.54E-19  | ZCCHC7, GRHPR, ZBTB5...         |
| chr9  | 71095721-94124443   | 23,029   | q21.11 - q22.31 | 380     | -0.541059             | 7.07E-177 | PGM5, C9orf71, PIP5K1B...       |
| chr9  | 130923464-131109445 | 186      | q34.11          | 8       | 1.092968              | 4.08E-17  | C9orf16, CIZ1, DNM1...          |
| chr9  | 133654917-134139531 | 485      | q34.12 - q34.13 | 18      | 2.292282              | 7.25E-151 | ABL1, QRFP, FIBCD1...           |
| chr10 | 87857715-135234843  | 47,377   | q23.1 - q26.3   | 973     | -0.502481             | 4.90E-324 | GRID1, MIR346, WAPAL...         |
| chr12 | 230421-23265912     | 23,035   | p13.33 - p12.1  | 529     | -0.488759             | 1.99E-199 | IQSEC3, LOC574538, SLC6A12...   |
| chr13 | 19296544-115011507  | 95,715   | q11 - q34       | 1716    | -0.453800             | 4.90E-324 | LOC284232, LOC348021, PHF2P1... |

This is an intermediate report and not a final signed off report

| Chr   | Start-Stop(bp)     | Size(kb) | Cytoband        | #Probes | Amp/Gain/<br>Loss/Del | P-value   | Annotations                   |
|-------|--------------------|----------|-----------------|---------|-----------------------|-----------|-------------------------------|
| chr13 | 23777913-74262909  | 50,485   | q12.12 - q22.1  | 918     | -0.548463             | 7.38E-15  | SGCG, SACS, TNFRSF19...       |
| chr13 | 81137986-81454116  | 316      | q31.1           | 5       | 2.051843              | 8.33E-52  |                               |
| chr13 | 90457836-93989566  | 3,532    | q31.3           | 65      | 1.301068              | 5.60E-314 | MIR622, LOC144776, MIR17HG... |
| chr13 | 90457836-92416896  | 1,959    | q31.3           | 34      | 1.924095              | 6.29E-23  | MIR622, LOC144776, MIR17HG... |
| chr13 | 92494334-92922405  | 428      | q31.3           | 12      | -0.757262             | 1.54E-76  | GPC5                          |
| chr13 | 92973314-93309763  | 336      | q31.3           | 9       | 2.159516              | 2.00E-12  | GPC5                          |
| chr13 | 93390362-93780465  | 390      | q31.3           | 6       | -0.424447             | 2.36E-30  | GPC5                          |
| chr13 | 93925051-93989566  | 65       | q31.3           | 3       | 2.663395              | 1.04E-10  | GPC6                          |
| chr14 | 20472548-107258824 | 86,786   | q11.2 - q32.33  | 1727    | -0.451063             | 4.90E-324 | OR4K14, OR4K13, OR4L1...      |
| chr15 | 20481702-26951736  | 6,470    | q11.1 - q12     | 79      | -0.274504             | 2.82E-11  | HERC2P3, GOLGA6L6, GOLGA8C... |
| chr16 | 79245968-85744160  | 6,498    | q23.2 - q24.1   | 145     | 0.392485              | 1.88E-37  | WWOX, MAF, DYNLRB2...         |
| chr17 | 148092-3962522     | 3,814    | p13.3 - p13.2   | 121     | -0.486275             | 2.49E-47  | RPH3AL, C17orf97, FAM101B...  |
| chr17 | 9739759-10049224   | 309      | p13.1           | 16      | -0.639248             | 2.83E-12  | GLP2R, RCVRN, GAS7            |
| chr17 | 10127678-12698956  | 2,571    | p13.1 - p12     | 49      | 0.346861              | 3.08E-11  | MYH13, MYH8, MYH4...          |
| chr17 | 12892005-14013054  | 1,121    | p12             | 19      | -0.720345             | 3.53E-17  | ARHGAP44, ELAC2, HS3ST3A1...  |
| chr17 | 14654074-19959014  | 5,305    | p12 - p11.2     | 130     | 0.368079              | 6.98E-30  | CDRT7, PMP22, TEK3...         |
| chr17 | 20141913-22205821  | 2,064    | p11.2 - p11.1   | 29      | -0.611404             | 4.11E-19  | SPECC1, CCDC144C, LGALS9B...  |
| chr17 | 26877778-27926708  | 1,049    | q11.2           | 46      | 0.504960              | 1.38E-20  | UNC119, PIGS, ALDOC...        |
| chr17 | 28206862-29385441  | 1,179    | q11.2           | 30      | -0.567062             | 5.48E-17  | SSH2, EFCAB5, CCDC55...       |
| chr18 | 142096-3100173     | 2,958    | p11.32 - p11.31 | 58      | 0.415208              | 7.99E-18  | USP14, THOC1, COLEC12...      |
| chr18 | 8113468-10949636   | 2,836    | p11.23 - p11.21 | 61      | 0.465438              | 5.91E-23  | PTPRM, LOC100192426, RAB12... |
| chr18 | 19506073-28354953  | 8,849    | q11.2 - q12.1   | 132     | 0.498759              | 4.78E-54  | GATA6, CTAGE1, RBBP8...       |

This is an intermediate report and not a final signed off report

| Chr   | Start-Stop(bp)      | Size(kb) | Cytoband        | #Probes | Amp/Gain/<br>Loss/Del | P-value   | Annotations                     |
|-------|---------------------|----------|-----------------|---------|-----------------------|-----------|---------------------------------|
| chr18 | 39600614-77982126   | 38,382   | q12.3 - q23     | 638     | -0.554992             | 2.18E-311 | PIK3C3, RIT2, SYT4...           |
| chr20 | 309960-26187794     | 25,878   | p13 - p11.1     | 484     | -0.514838             | 6.88E-204 | SOX12, NRSN2, TRIB3...          |
| chr21 | 25203765-48018909   | 22,815   | q21.2 - q22.3   | 545     | 0.364229              | 3.46E-116 | NCRNA00158, MIR155HG, MIR155... |
| chr22 | 18919942-23627391   | 4,707    | q11.21 - q11.23 | 125     | 1.827931              | 4.90E-324 | PRODH, DGCR5, DGCR9...          |
| chr22 | 22892487-23627391   | 735      | q11.22 - q11.23 | 21      | 2.401546              | 7.24E-13  | PRAME, LOC648691, POM121L1P...  |
| chr22 | 24092647-51104602   | 27,012   | q11.23 - q13.33 | 732     | -0.472160             | 1.75E-259 | ZNF70, VPRED3, C22orf15...      |
| chrX  | 61091-2502925       | 2,442    | p22.33          | 88      | -0.355334             | 1.58E-19  | PLCXD1, GTPBP6, NCRNA00107...   |
| chrX  | 2709027-58051765    | 55,343   | p22.33 - p11.21 | 989     | 0.332787              | 3.29E-172 | XG, GYG2, ARSD...               |
| chrX  | 62645308-154754171  | 92,109   | q11.1 - q28     | 1575    | 0.335781              | 4.22E-278 | LOC92249, ARHGEF9, MIR1468...   |
| chrX  | 113275135-114305500 | 1,030    | q23             | 22      | 0.857009              | 2.28E-11  | HTR2C, SNORA35, MIR764...       |
| chrY  | 11091-2452925       | 2,442    | p11.32          | 88      | -0.355334             | 1.58E-19  | PLCXD1, GTPBP6, NCRNA00107...   |
| chrY  | 2656461-9901314     | 7,245    | p11.31 - p11.2  | 59      | -2.299345             | 3.16E-322 | RPS4Y1, ZFY, TGIF2LY...         |
| chrY  | 14061053-28767604   | 14,707   | q11.21 - q11.23 | 144     | -1.551901             | 4.90E-324 | GYG2P1, TTTY15, USP9Y...        |
| chrY  | 14061053-14463950   | 403      | q11.21          | 7       | -3.411399             | 1.01E-22  |                                 |
| chrY  | 16017052-16640171   | 623      | q11.221         | 9       | -0.591284             | 9.18E-14  | VCY1B, VCY, NLGN4Y              |
| chrY  | 17890214-18225843   | 336      | q11.221         | 4       | -3.092707             | 2.48E-11  |                                 |
| chrY  | 18255453-19291733   | 1,036    | q11.221         | 11      | -0.644042             | 4.10E-16  |                                 |
| chrY  | 21491899-21768349   | 276      | q11.222         | 5       | -3.211339             | 6.10E-13  | BCORP1, CYorf15A, CYorf15B      |

Amp=Amplification Del=Deletion

Total Amp/Gain/Loss/Del Intervals: 83

This is an intermediate report and not a final signed off report

## Analysis Settings

|                                  |                                                                                                                                                               |                             |                                                                                                                                                                                                                                                                                                                                                                                                                                                                                                                                                                                                                                                                                                                   |
|----------------------------------|---------------------------------------------------------------------------------------------------------------------------------------------------------------|-----------------------------|-------------------------------------------------------------------------------------------------------------------------------------------------------------------------------------------------------------------------------------------------------------------------------------------------------------------------------------------------------------------------------------------------------------------------------------------------------------------------------------------------------------------------------------------------------------------------------------------------------------------------------------------------------------------------------------------------------------------|
| Design                           | : 021924_20101001                                                                                                                                             | Sample Name                 | : 252192435816_2_2                                                                                                                                                                                                                                                                                                                                                                                                                                                                                                                                                                                                                                                                                                |
| Genome                           | : hg19                                                                                                                                                        | Aberration Algorithm        | : ADM-2                                                                                                                                                                                                                                                                                                                                                                                                                                                                                                                                                                                                                                                                                                           |
| Threshold                        | : 6.0                                                                                                                                                         | Fuzzy Zero                  | : OFF                                                                                                                                                                                                                                                                                                                                                                                                                                                                                                                                                                                                                                                                                                             |
| GC Correction                    | : ON                                                                                                                                                          | Window Size                 | : 2Kb                                                                                                                                                                                                                                                                                                                                                                                                                                                                                                                                                                                                                                                                                                             |
| Centralization (legacy)          | : OFF                                                                                                                                                         | Diploid Peak Centralization | : ON                                                                                                                                                                                                                                                                                                                                                                                                                                                                                                                                                                                                                                                                                                              |
| SNP Copy Number                  | : OFF                                                                                                                                                         | LOH                         | : OFF                                                                                                                                                                                                                                                                                                                                                                                                                                                                                                                                                                                                                                                                                                             |
| Combine Replicates (Intra Array) | : ON                                                                                                                                                          | Array Level Filter          | : NONE                                                                                                                                                                                                                                                                                                                                                                                                                                                                                                                                                                                                                                                                                                            |
| Metric Set Filter                | : NONE                                                                                                                                                        | Aberration Filter           | : Minimum Number of Probes for Amplification $\geq 3$ AND Nesting Level $\leq 100$ AND Minimum Avg. Absolute Log Ratio for Amplification $\geq 0.25$ AND Minimum Size (Kb) of Region for Amplification $\geq 0.0$ AND Minimum Size (Kb) of Region for Deletion $\geq 0.0$ AND Minimum Number of Probes for Deletion $\geq 3$ AND Minimum Avg. Absolute Log Ratio for Deletion $\geq 0.25$ AND Minimum Number of Probes for Gain $\geq 3$ AND Minimum Number of Probes for Loss $\geq 3$ AND Minimum Avg. Absolute Log Ratio for Gain $\geq 0.25$ AND Minimum Avg. Absolute Log Ratio for Loss $\geq 0.25$ AND Minimum Size (Kb) of Region for Gain $\geq 0.0$ AND Minimum Size (Kb) of Region for Loss $\geq 0.0$ |
| Feature Level Filter             | : gIsSaturated = true OR<br>rlsSaturated = true OR<br>gIsFeatNonUnifOL = true OR<br>rlsFeatNonUnifOL = true OR<br>LogRatio = 0; Include matching values=false | Design Level Filter         | : Homology = 0 OR<br>IsPseudoautosomal = 1                                                                                                                                                                                                                                                                                                                                                                                                                                                                                                                                                                                                                                                                        |
| LOH Filter                       | : NONE                                                                                                                                                        | Genomic Boundary            | : OFF                                                                                                                                                                                                                                                                                                                                                                                                                                                                                                                                                                                                                                                                                                             |
| Show Flat Intervals              | : false                                                                                                                                                       | Template Name               | : Default Cyto Report Template - CGH                                                                                                                                                                                                                                                                                                                                                                                                                                                                                                                                                                                                                                                                              |

**This is an intermediate report and not a final signed off report**

| Notes                            |                     |
|----------------------------------|---------------------|
| Sample Notes                     | No notes available. |
| Amp/Gain/Loss/Del Interval Notes | No notes available. |

This is an intermediate report and not a final signed off report
