# Supplementary material for: DNA Fingerprint Analysis of Raman Spectra Captures Global Genomic Alterations in Imatinib-Resistant Chronic Myeloid Leukemia: A Potential Single Assay for Screening Imatinib Resistance
Source: MDPI journal article supplement (doi:10.3390/cells10102506), 2021-09-22
Supplement: s1 [file s1]

Sample Information

Green Sample : Research K562-R  
Array ID : 252192435816\_2\_3  
Global Display Name : 252192435816\_2\_3  
Polarity : -1  
Red Sample : Reference DNA  
DerivativeOfLogRatioSD : 0.324231  
Intermediate Report by : DATASYSTEM\admin

Genome View (Amp/Del)

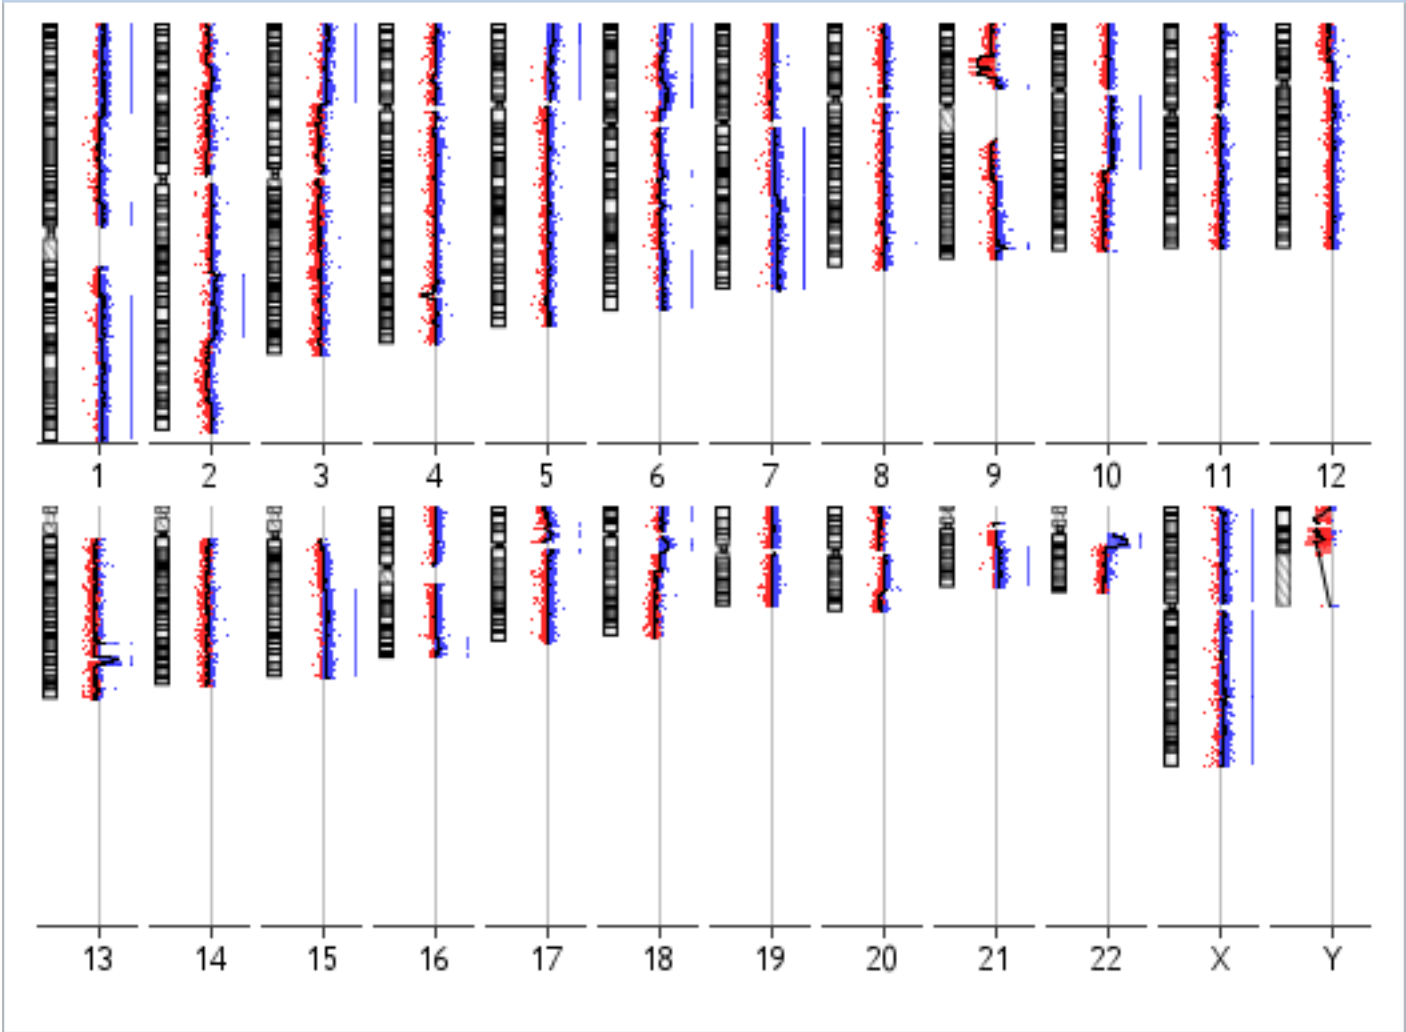

This is an intermediate report and not a final signed off report

## Chromosome Views (Amp/Del)

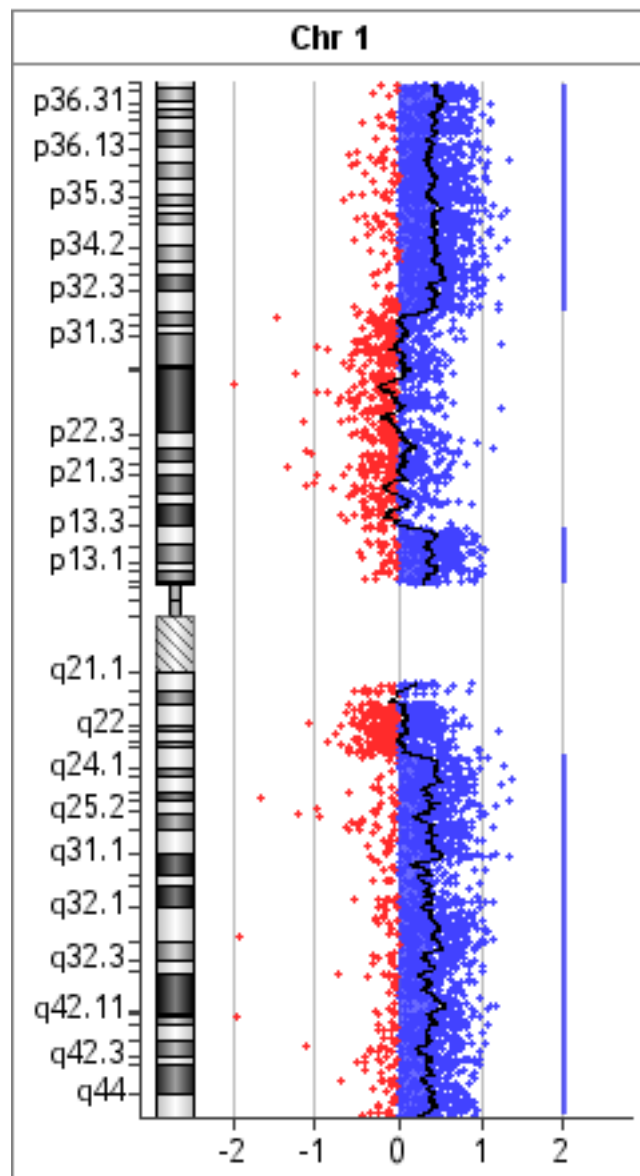

This is an intermediate report and not a final signed off report

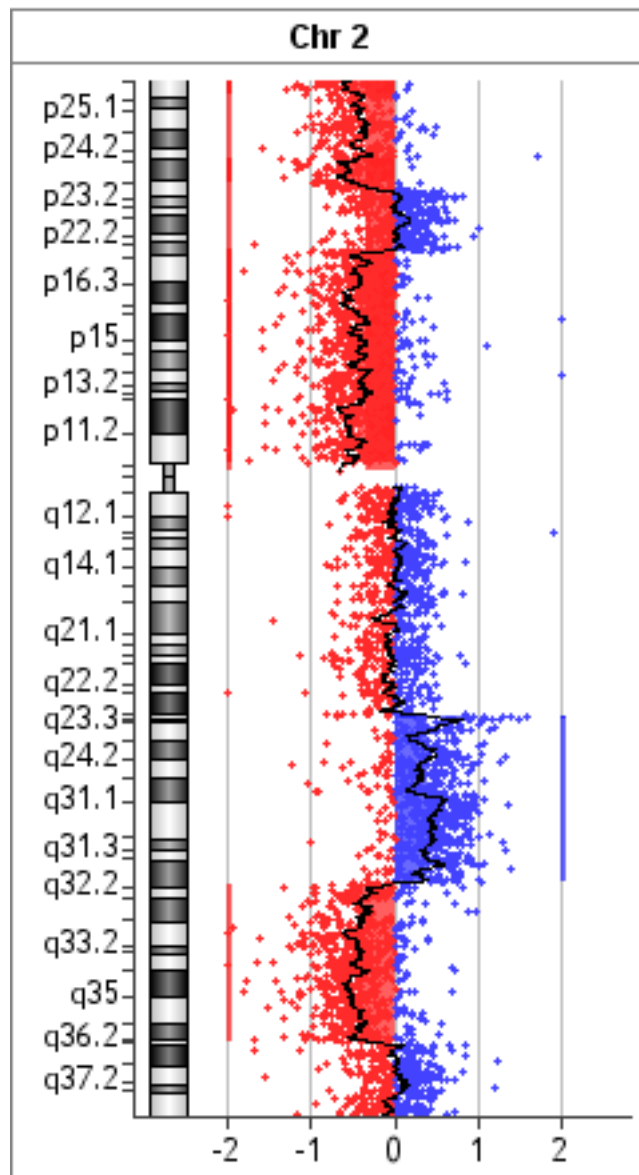

This is an intermediate report and not a final signed off report

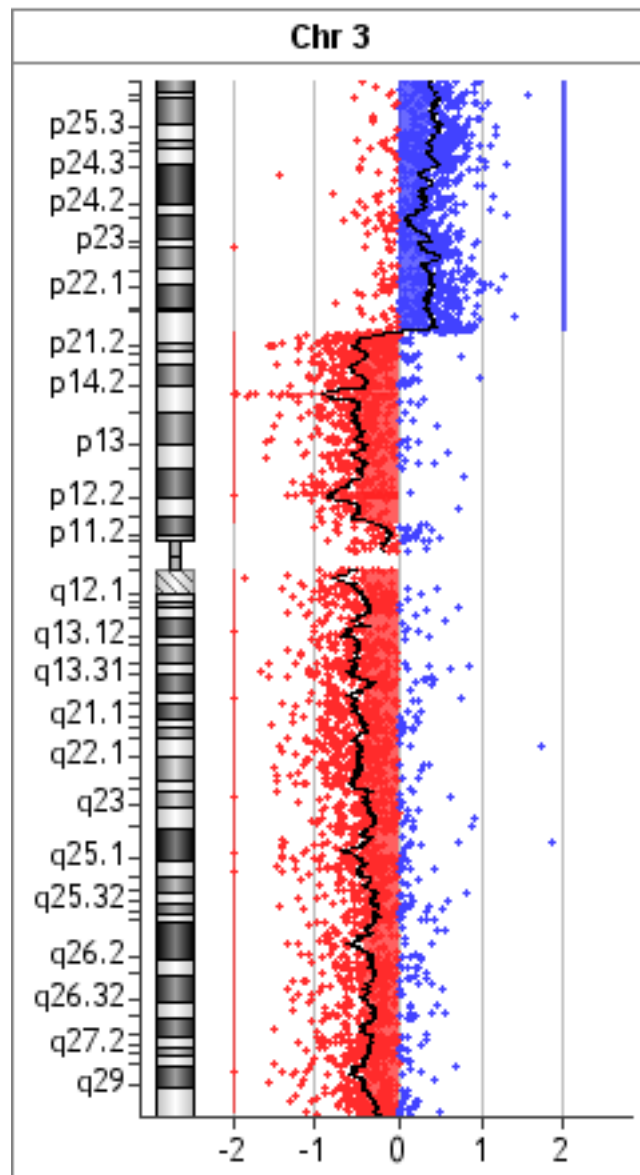

This is an intermediate report and not a final signed off report

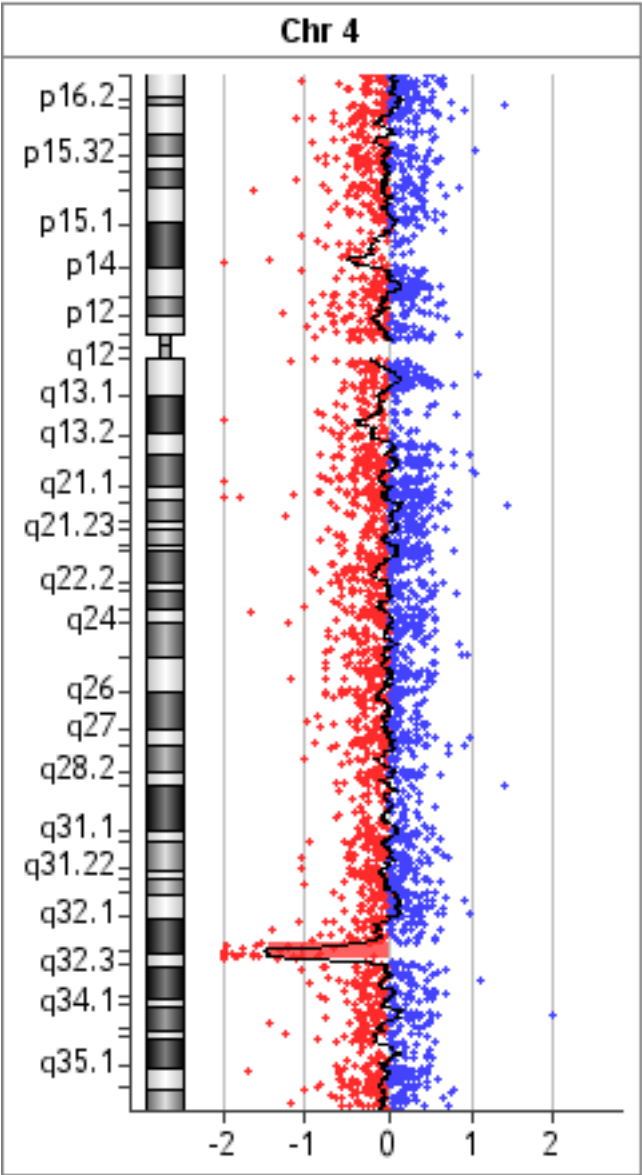

This is an intermediate report and not a final signed off report

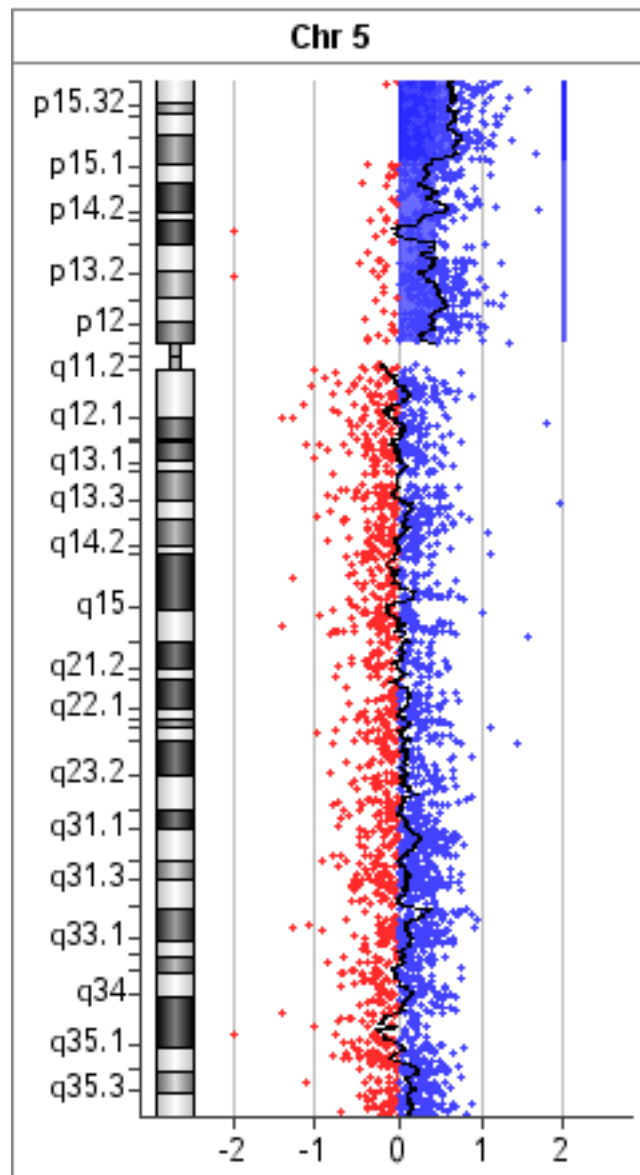

This is an intermediate report and not a final signed off report

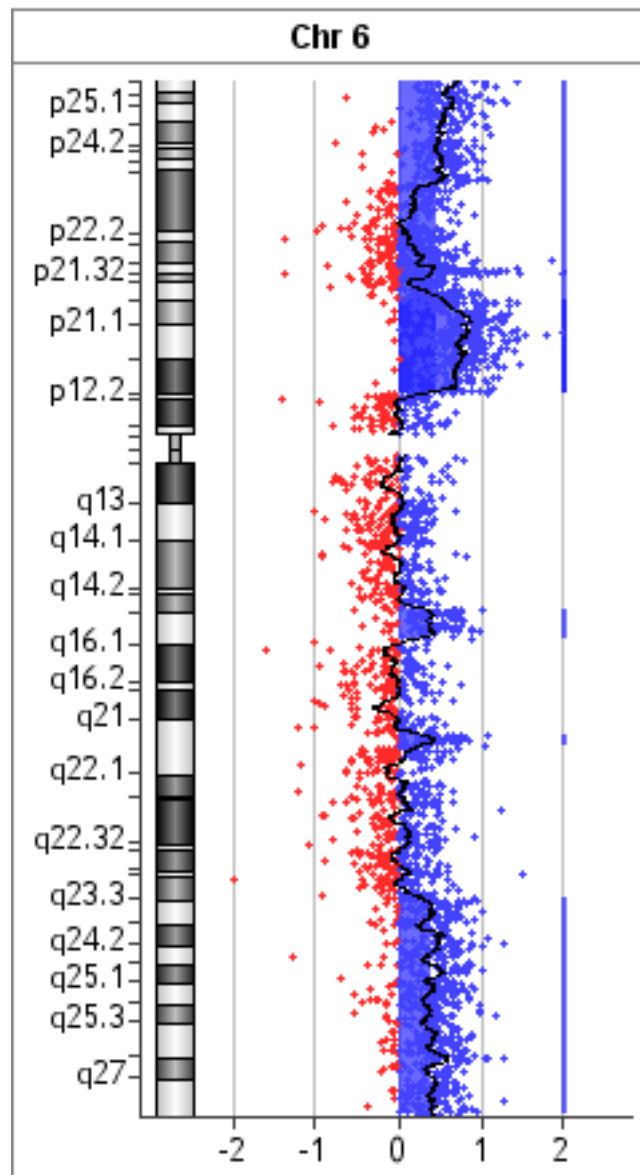

This is an intermediate report and not a final signed off report

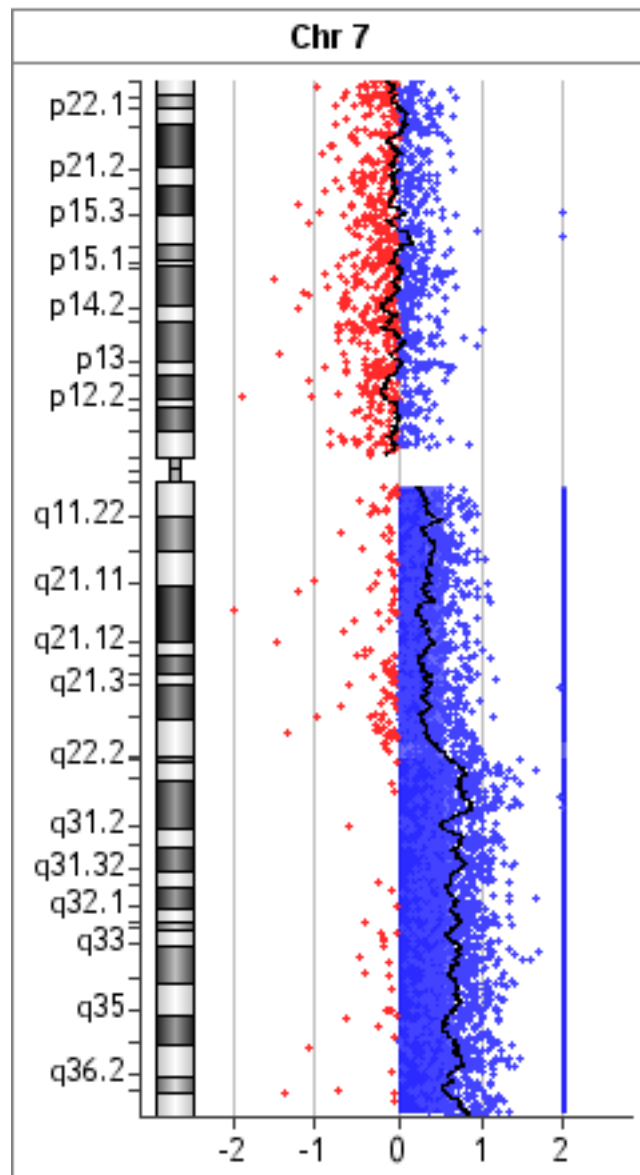

This is an intermediate report and not a final signed off report



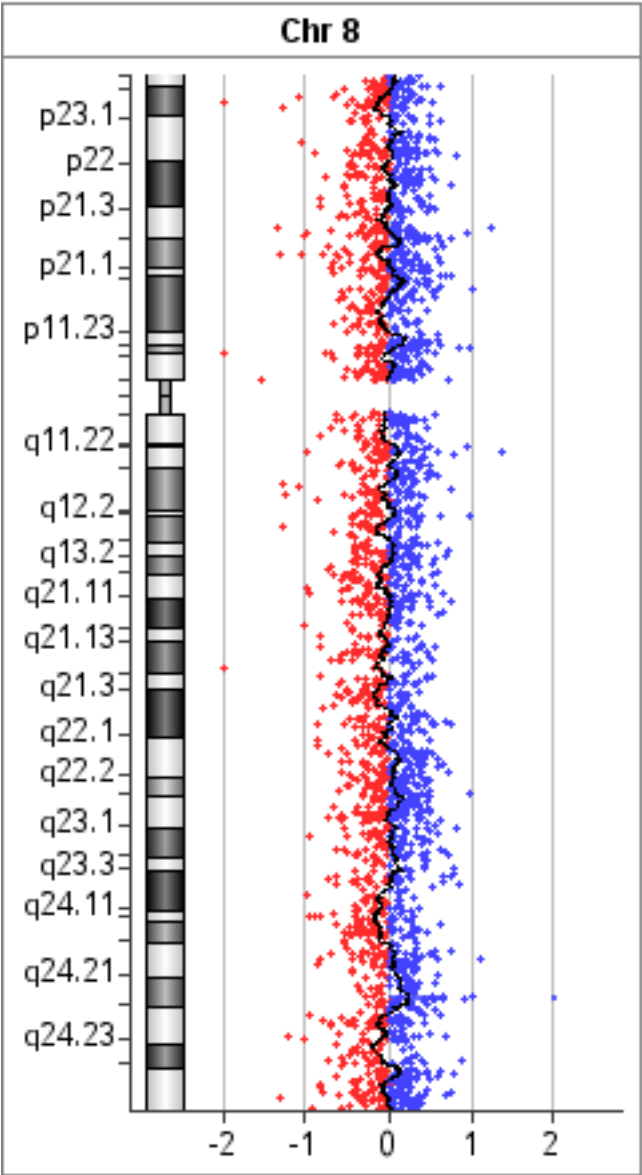

This is an intermediate report and not a final signed off report

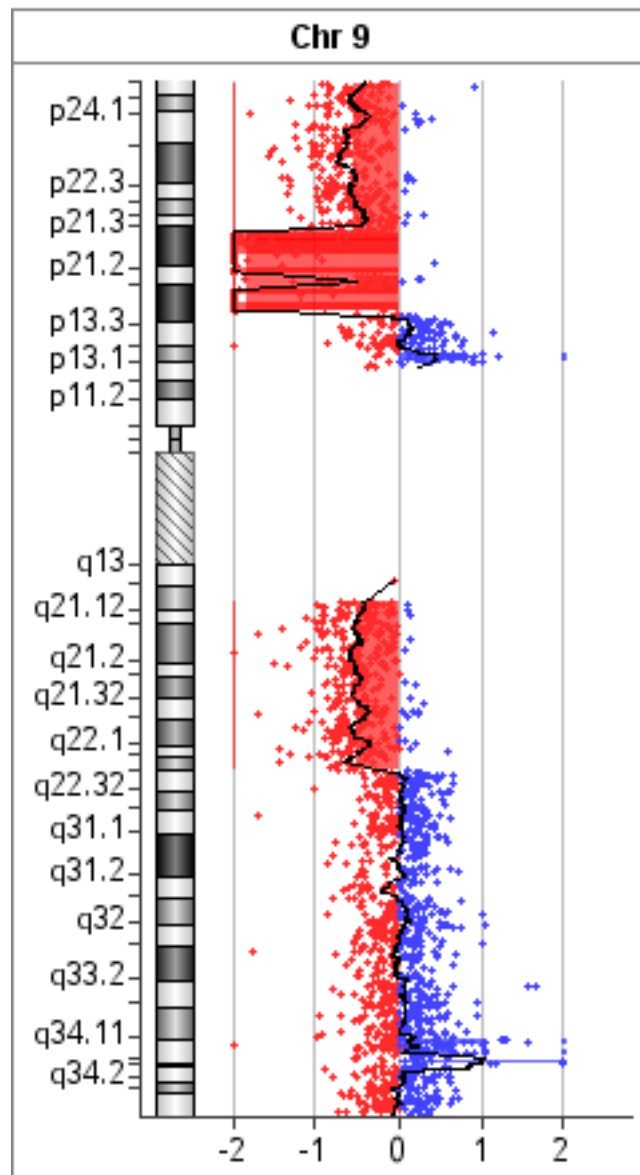

This is an intermediate report and not a final signed off report

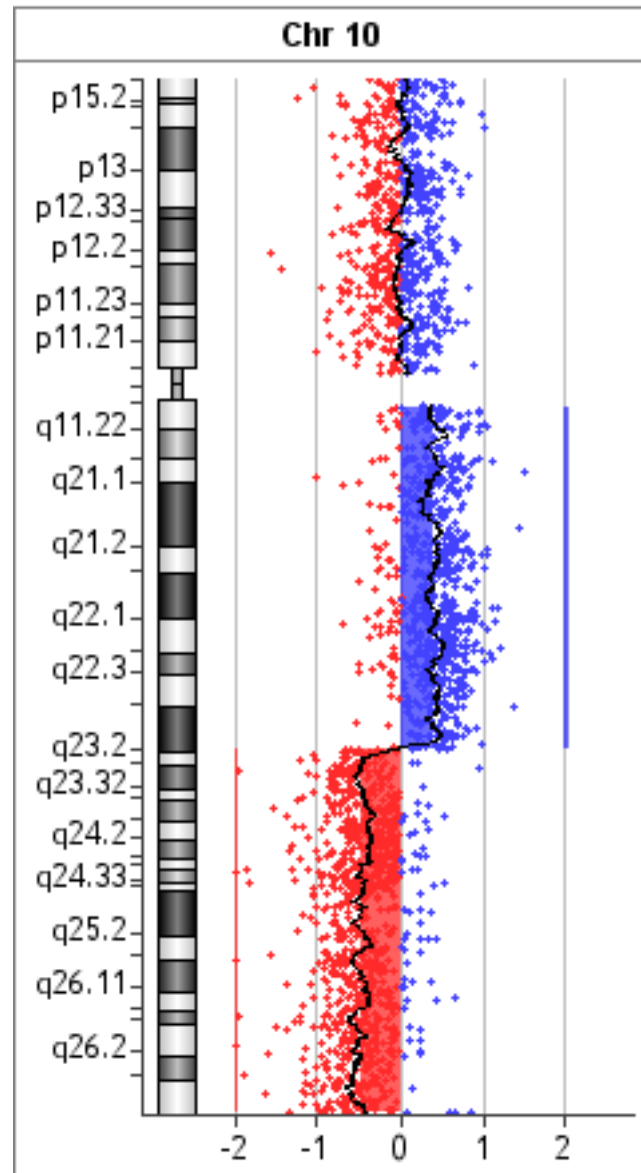

This is an intermediate report and not a final signed off report

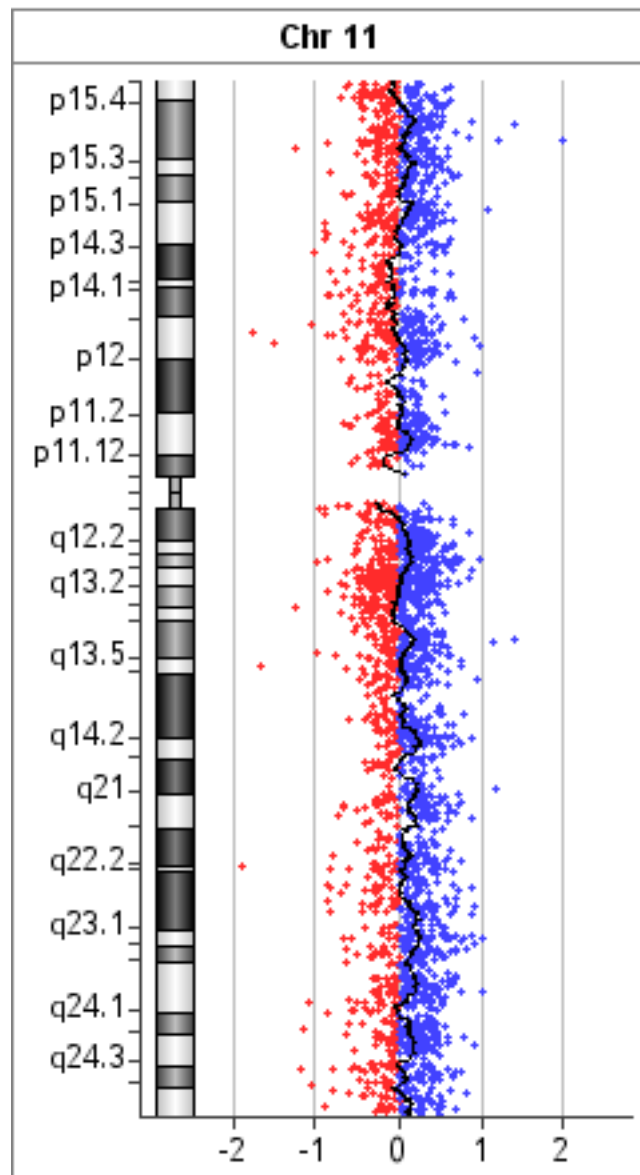

This is an intermediate report and not a final signed off report

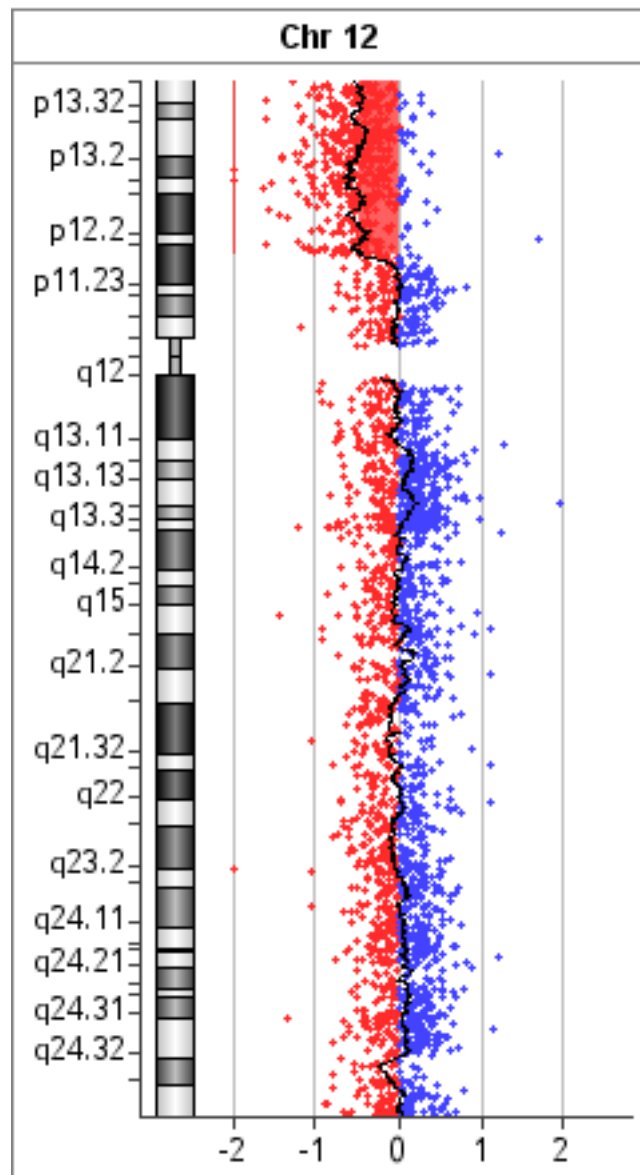

This is an intermediate report and not a final signed off report

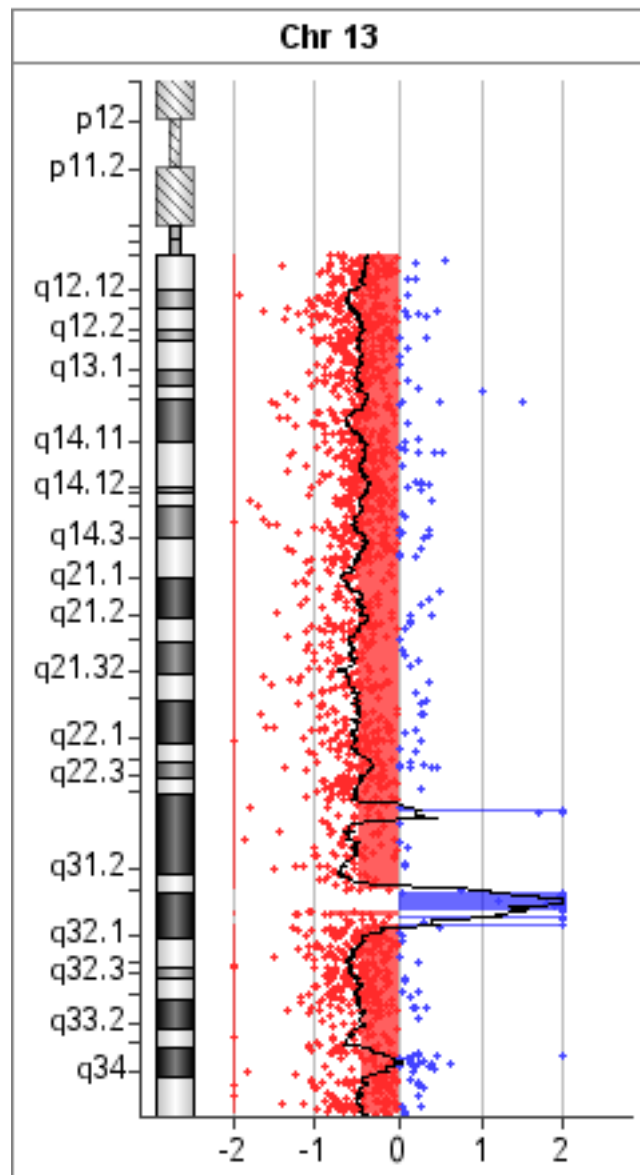

This is an intermediate report and not a final signed off report

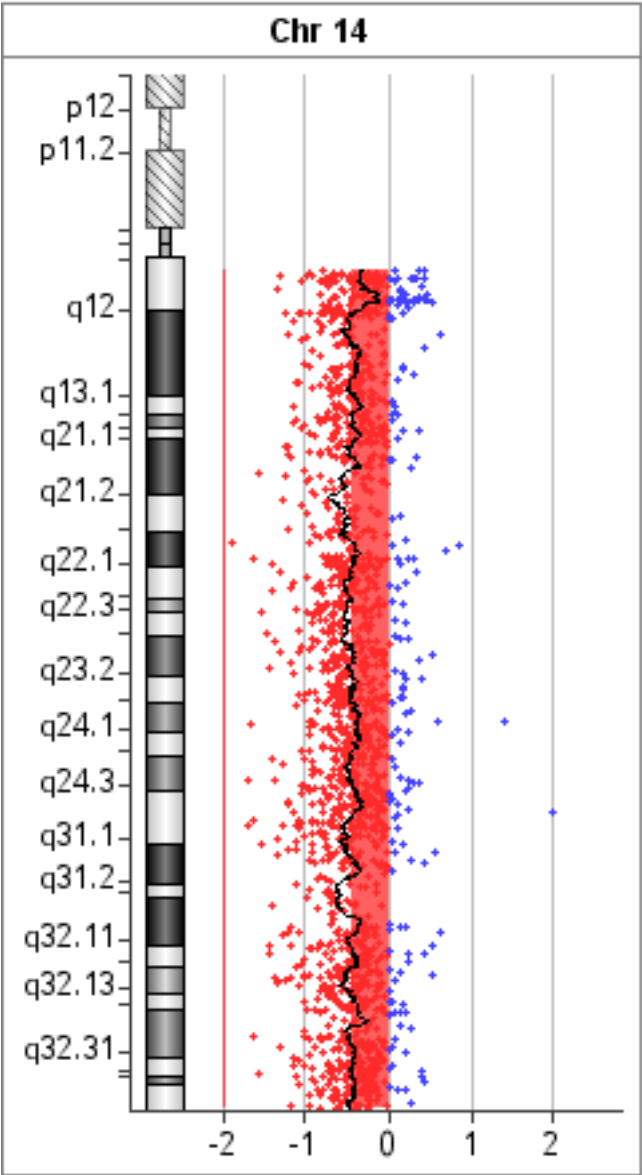

This is an intermediate report and not a final signed off report

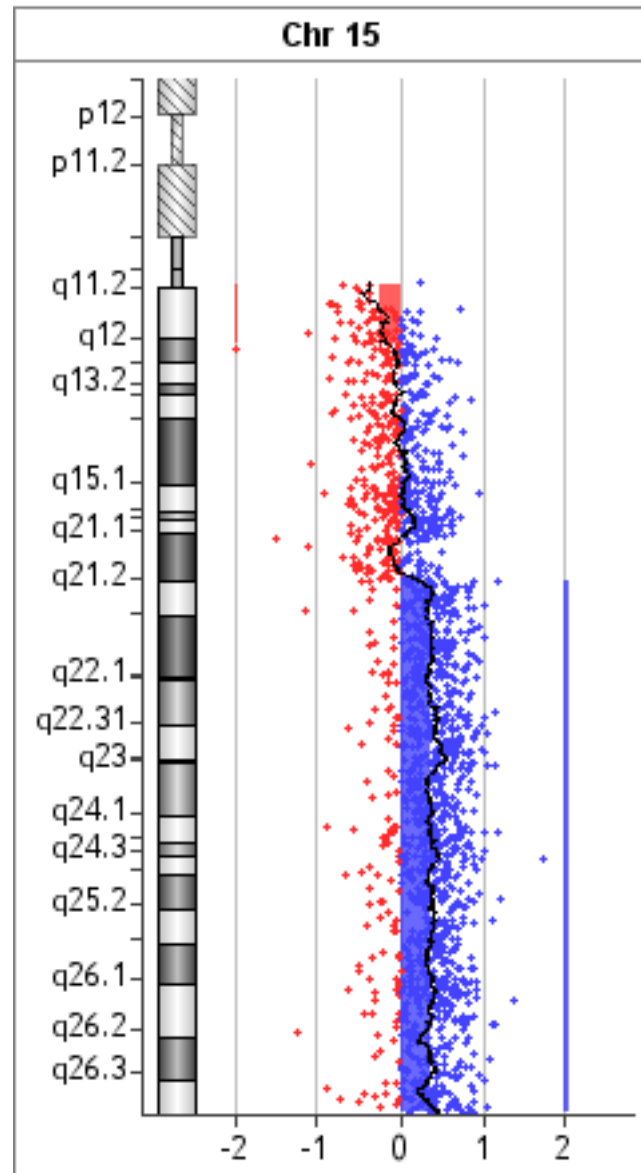

This is an intermediate report and not a final signed off report



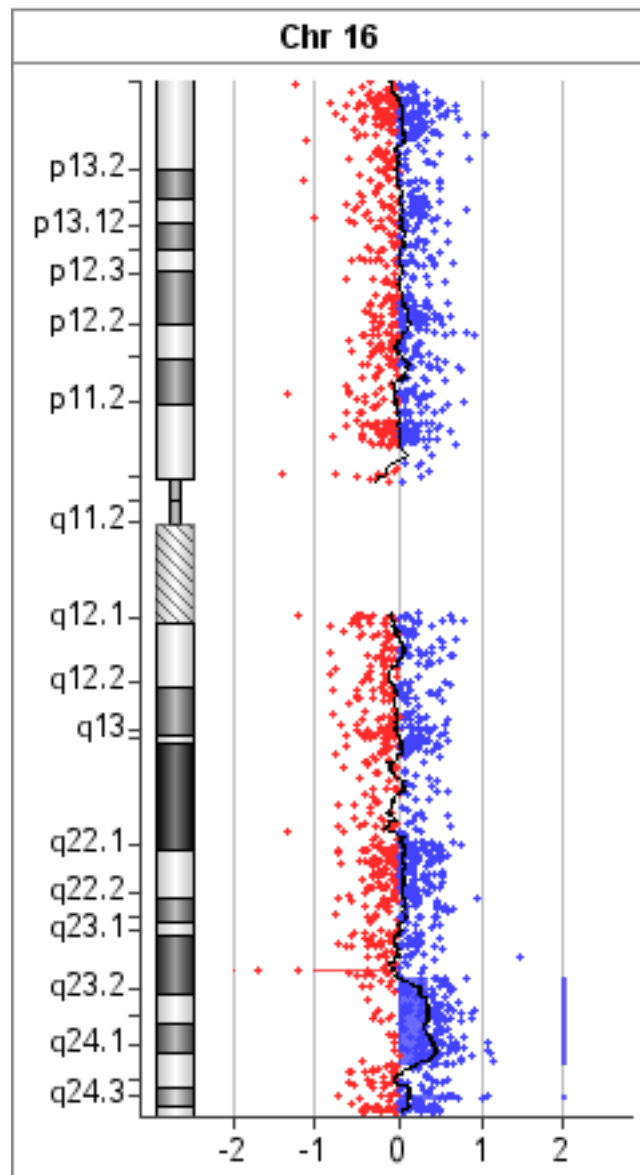

This is an intermediate report and not a final signed off report

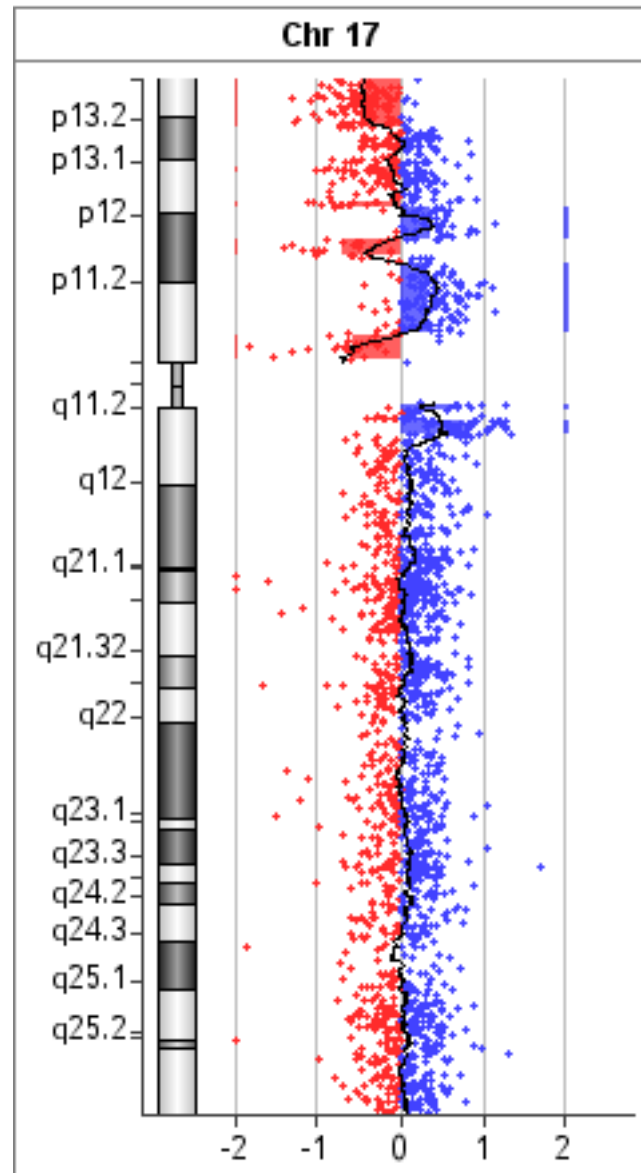

This is an intermediate report and not a final signed off report

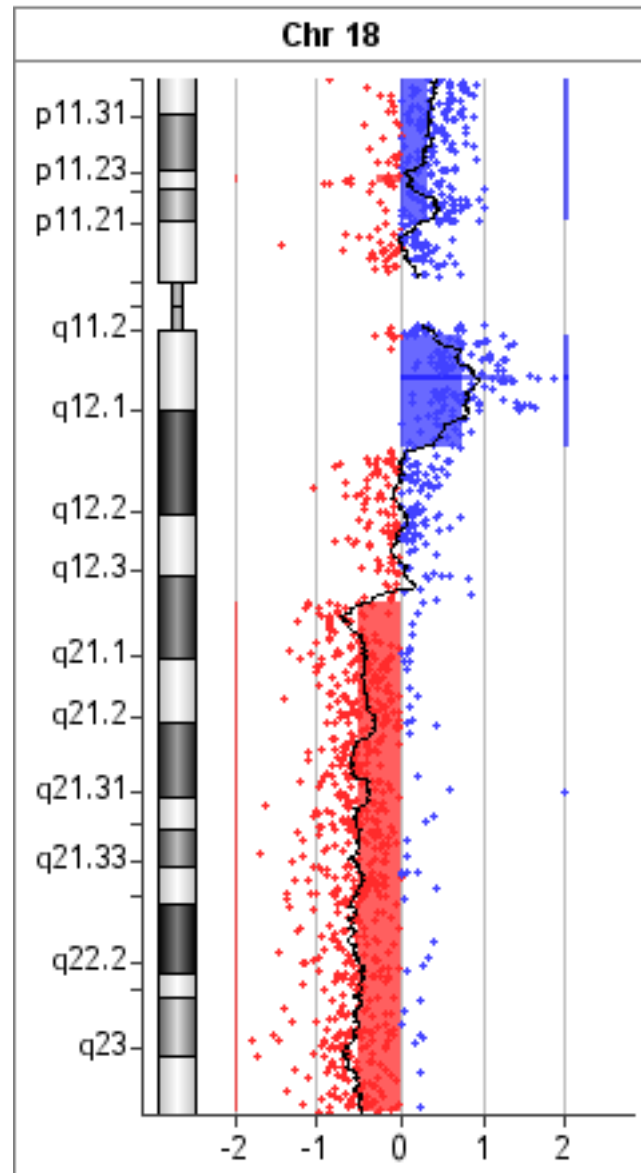

This is an intermediate report and not a final signed off report

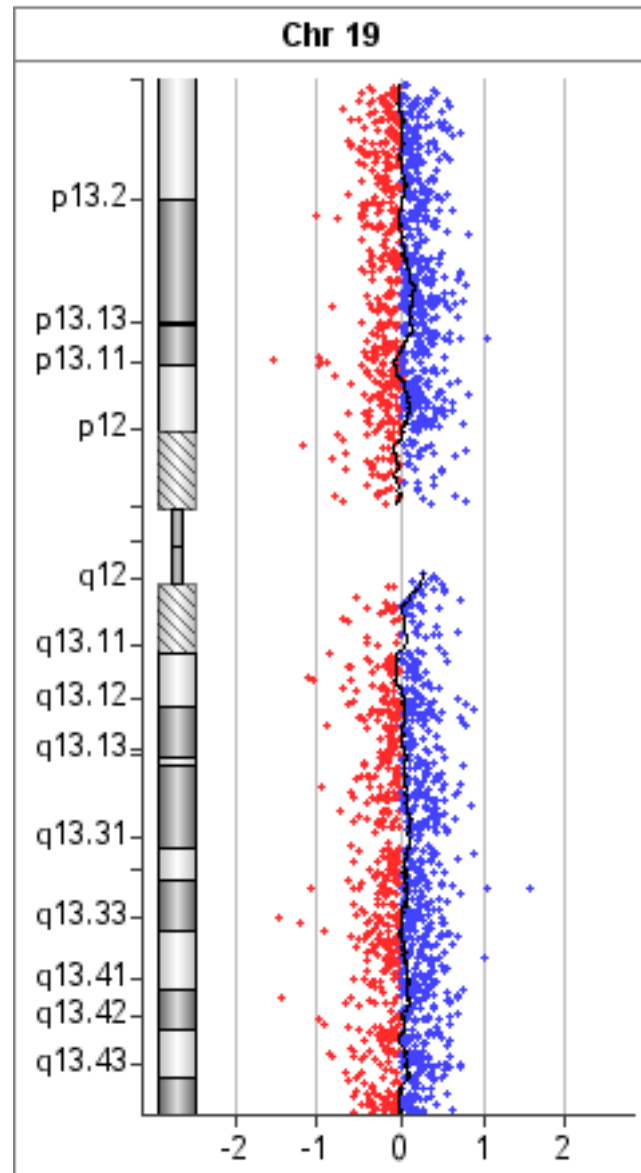

This is an intermediate report and not a final signed off report

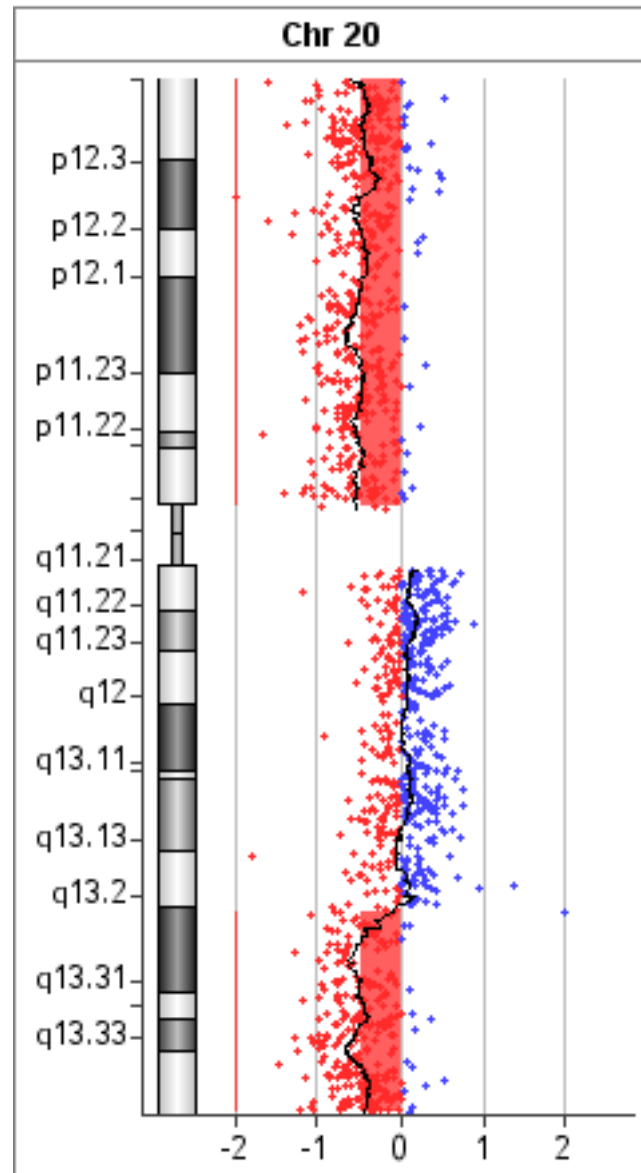

This is an intermediate report and not a final signed off report

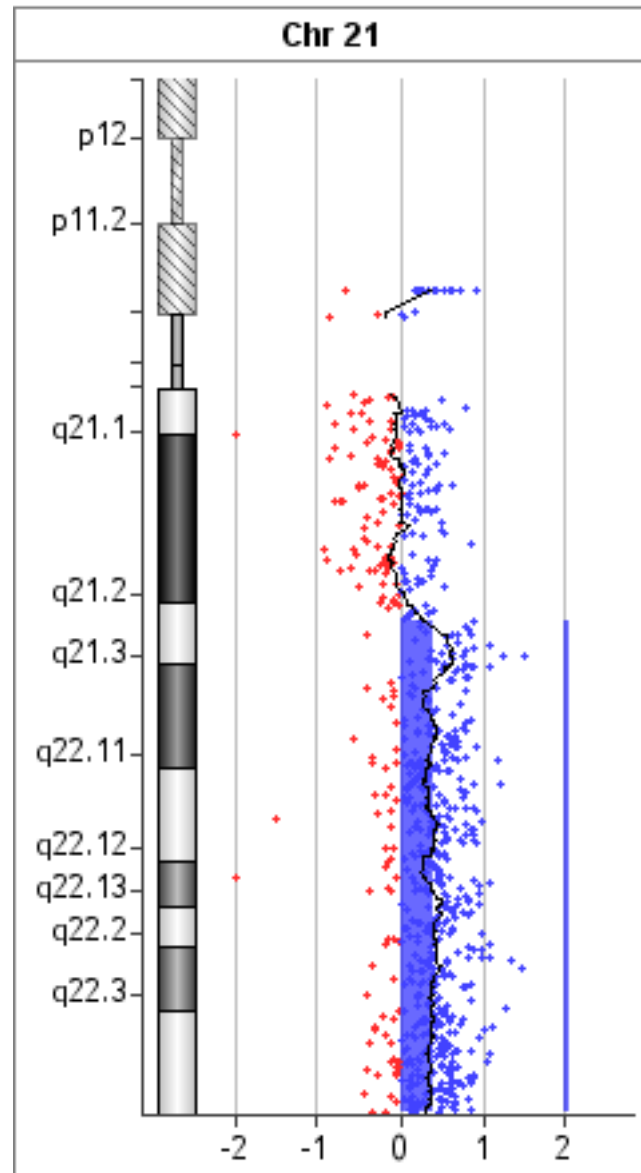

This is an intermediate report and not a final signed off report

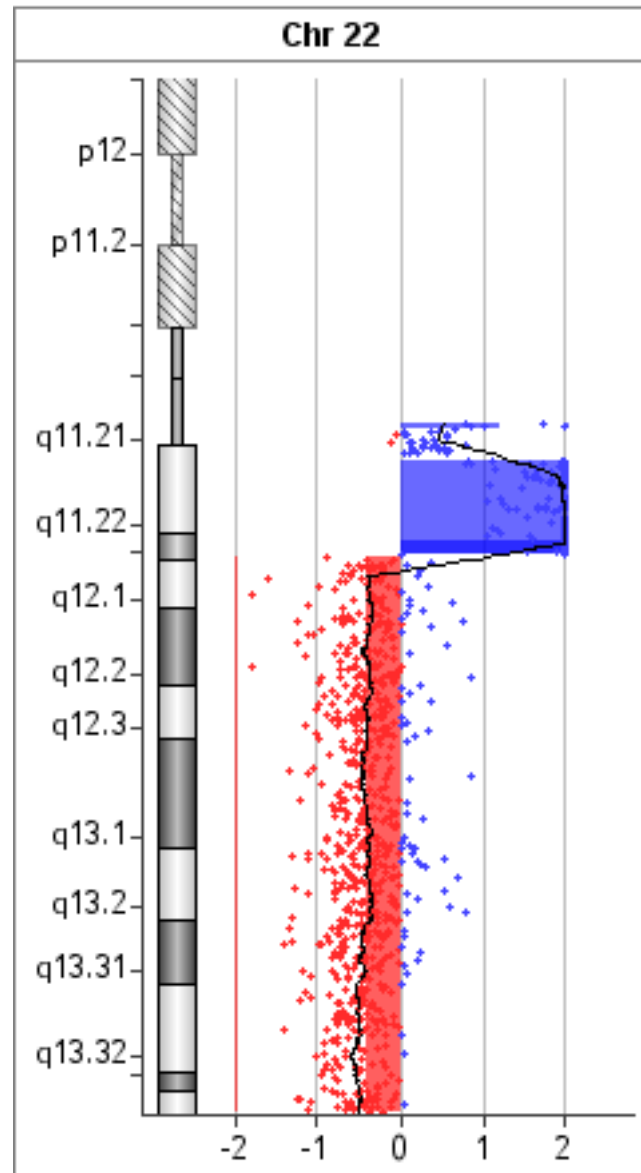

This is an intermediate report and not a final signed off report

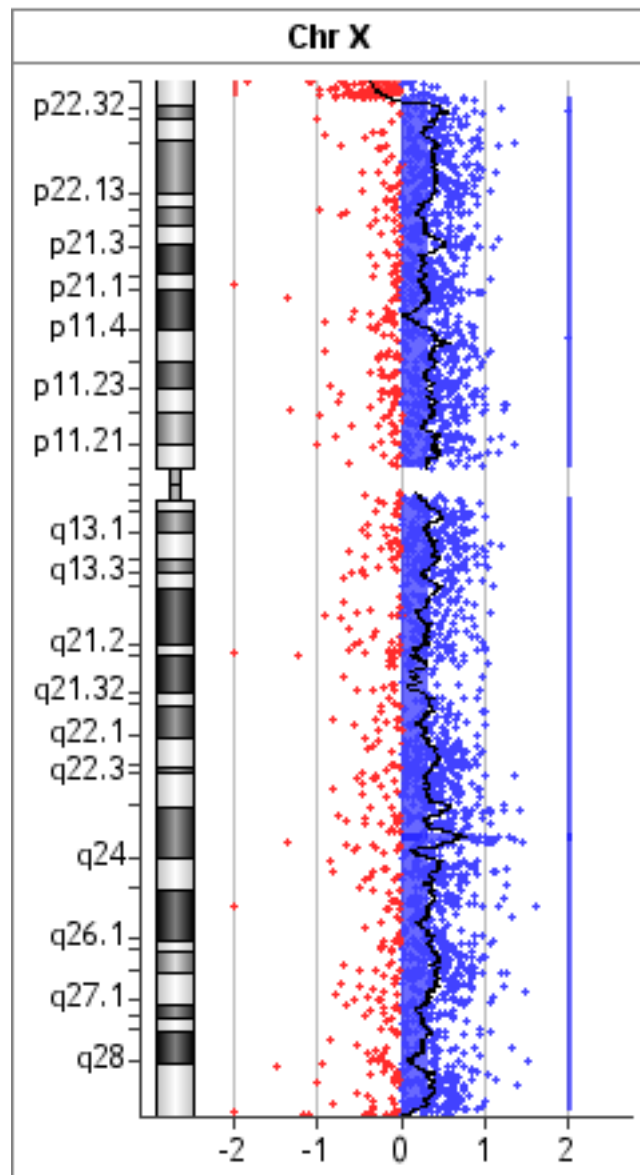

This is an intermediate report and not a final signed off report



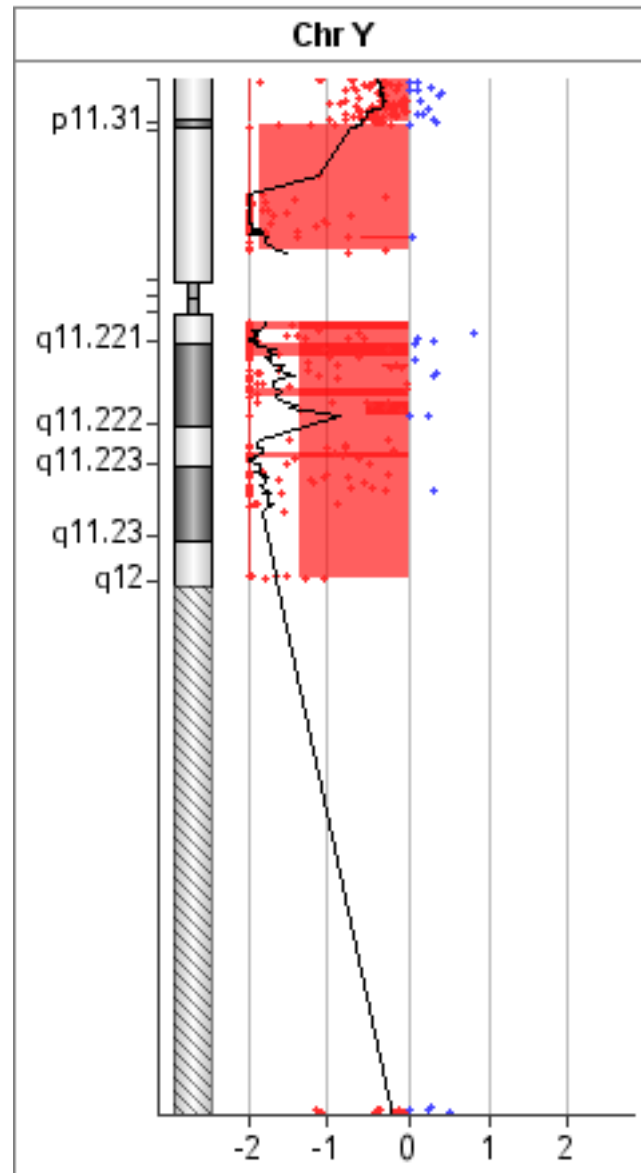

This is an intermediate report and not a final signed off report

## Amp/Gain/Loss/Del Intervals Table

| Chr  | Start-Stop(bp)      | Size(kb) | Cytoband       | #Probes | Amp/Gain/<br>Loss/Del | P-value   | Annotations                    |
|------|---------------------|----------|----------------|---------|-----------------------|-----------|--------------------------------|
| chr1 | 852863-55252418     | 54,400   | p36.33 - p32.3 | 1280    | 0.419838              | 4.90E-324 | FLJ39609, SAMD11, NOC2L...     |
| chr1 | 107600977-121281170 | 13,680   | p13.3 - p11.2  | 312     | 0.379033              | 3.32E-105 | PRMT6, NTNG1, VAV3...          |
| chr1 | 162366109-249151859 | 86,786   | q23.3 - q44    | 1734    | 0.381137              | 4.90E-324 | SH2D1B, UHMK1, UAP1...         |
| chr2 | 42444-91766271      | 91,724   | p25.3 - p11.1  | 1610    | -0.336081             | 4.90E-324 | FAM110C, SH3YL1, ACP1...       |
| chr2 | 206212-3338027      | 3,132    | p25.3          | 53      | -0.595295             | 4.32E-10  | SH3YL1, ACP1, FAM150B...       |
| chr2 | 18532630-23931404   | 5,399    | p24.2 - p24.1  | 66      | -0.628408             | 7.05E-15  | RDH14, NT5C1B-RDH14, NT5C1B... |
| chr2 | 39990107-90069726   | 50,080   | p22.1 - p11.2  | 888     | -0.444143             | 1.08E-25  | THUMP2, SLC8A1, LOC388942...   |
| chr2 | 149378946-188546067 | 39,167   | q23.1 - q32.1  | 696     | 0.401962              | 1.36E-259 | EPC2, KIF5C, LYPD6B...         |
| chr2 | 149378946-150251368 | 872      | q23.1 - q23.2  | 19      | 1.002411              | 7.95E-18  | EPC2, KIF5C, LYPD6B...         |
| chr2 | 189068304-225945697 | 36,877   | q32.1 - q36.2  | 735     | -0.436839             | 1.42E-319 | GULP1, MIR561, DIRC1...        |
| chr3 | 159711-48219787     | 48,060   | p26.3 - p21.31 | 876     | 0.366380              | 1.30E-272 | CHL1, CNTN6, CNTN4...          |
| chr3 | 48456307-84777471   | 36,321   | p21.31 - p12.1 | 704     | -0.503400             | 4.90E-324 | PLXNB1, CCDC51, CCDC72...      |
| chr3 | 59764652-60055536   | 291      | p14.2          | 10      | -1.378287             | 9.21E-18  | FHIT                           |
| chr3 | 78647198-80162698   | 1,516    | p12.3 - p12.2  | 23      | -0.906974             | 2.32E-10  | ROBO1                          |
| chr3 | 93580736-197803820  | 104,223  | q11.1 - q29    | 1899    | -0.408153             | 4.90E-324 | PROS1, ARL13B, STX19...        |
| chr4 | 160517264-163435909 | 2,919    | q32.1 - q32.2  | 30      | -1.442988             | 5.26E-131 | FSTL5                          |
| chr5 | 151737-46100367     | 45,949   | p15.33 - p11   | 649     | 0.454856              | 6.07E-310 | PLEKHG4B, LRRC14B, CCDC127...  |
| chr5 | 364170-14011580     | 13,647   | p15.33 - p15.2 | 183     | 0.659460              | 1.02E-19  | AHRR, LOC100310782, C5orf55... |
| chr6 | 170426-51781749     | 51,611   | p25.3 - p12.3  | 1145    | 0.445796              | 4.90E-324 | DUSP22, IRF4, EXOC2...         |
| chr6 | 31636310-31831356   | 195      | p21.33         | 26      | 0.863127              | 2.97E-28  | CSNK2B, LY6G5B, LY6G5C...      |

This is an intermediate report and not a final signed off report

| Chr   | Start-Stop(bp)      | Size(kb) | Cytoband        | #Probes | Amp/Gain/<br>Loss/Del | P-value   | Annotations                              |
|-------|---------------------|----------|-----------------|---------|-----------------------|-----------|------------------------------------------|
| chr6  | 36437799-51732931   | 15,295   | p21.31 - p12.3  | 337     | 0.730621              | 2.70E-65  | KCTD20, STK38, SRSF3...                  |
| chr6  | 87429974-92573234   | 5,143    | q14.3 - q15     | 97      | 0.396478              | 4.48E-37  | HTR1E, CGA, ZNF292...                    |
| chr6  | 108108995-110036365 | 1,927    | q21             | 46      | 0.451328              | 1.72E-23  | SCML4, SEC63, OSTM1...                   |
| chr6  | 135271127-170890108 | 35,619   | q23.3 - q27     | 625     | 0.391941              | 7.26E-223 | ALDH8A1, HBS1L, MIR3662...               |
| chr7  | 62654304-159088636  | 96,434   | q11.21 - q36.3  | 2053    | 0.548113              | 4.90E-324 | LOC643955, LOC100287704, LOC100287834... |
| chr7  | 63108972-102114142  | 39,005   | q11.21 - q22.1  | 747     | 0.330151              | 7.89E-84  | ZNF727, ZNF735, ZNF679...                |
| chr7  | 104343173-158909738 | 54,567   | q22.2 - q36.3   | 1261    | 0.677689              | 6.74E-51  | LHFPL3, LOC645591, LOC723809...          |
| chr8  | 130425357-130788501 | 363      | q24.21          | 9       | 0.641310              | 1.92E-10  | GSDMC                                    |
| chr9  | 373868-20718810     | 20,345   | p24.3 - p21.3   | 326     | -0.523864             | 6.18E-206 | DOCK8, KANK1, DMRT1...                   |
| chr9  | 20737427-31510599   | 10,773   | p21.3 - p21.1   | 153     | -1.812013             | 4.90E-324 | KIAA1797, PTPLAD2, IFNB1...              |
| chr9  | 21002866-23724873   | 2,722    | p21.3           | 53      | -2.853239             | 1.12E-71  | PTPLAD2, IFNB1, IFNW1...                 |
| chr9  | 21500692-21547395   | 47       | p21.3           | 3       | -4.911891             | 1.02E-10  | LOC554202, MIR31                         |
| chr9  | 25583028-26465048   | 882      | p21.3 - p21.2   | 8       | -3.991042             | 1.70E-34  | TUSC1                                    |
| chr9  | 26649384-28428190   | 1,779    | p21.2 - p21.1   | 35      | -0.452039             | 3.20E-151 | C9orf82, PLAA, IFT74...                  |
| chr9  | 28670476-29137041   | 467      | p21.1           | 8       | -3.841779             | 7.18E-31  | LINGO2, MIR876, MIR873                   |
| chr9  | 30520898-31510599   | 990      | p21.1           | 13      | -2.738717             | 2.40E-16  |                                          |
| chr9  | 37288390-38403251   | 1,115    | p13.2 - p13.1   | 27      | 0.579531              | 8.38E-23  | ZCCHC7, GRHPR, ZBTB5...                  |
| chr9  | 71035346-94124443   | 23,089   | q21.11 - q22.31 | 381     | -0.489899             | 2.06E-211 | PGM5, C9orf71, PIP5K1B...                |
| chr9  | 130923464-131109445 | 186      | q34.11          | 8       | 1.070250              | 3.25E-23  | C9orf16, CIZ1, DNM1...                   |
| chr9  | 132436581-132612549 | 176      | q34.11          | 8       | 0.698871              | 6.27E-11  | PRRX2, PTGES, TOR1B...                   |
| chr9  | 133654917-134139531 | 485      | q34.12 - q34.13 | 18      | 2.453455              | 1.32E-218 | ABL1, QRF, FIBCD1...                     |
| chr10 | 42976950-87825601   | 44,849   | q11.21 - q23.1  | 746     | 0.399390              | 8.59E-276 | LOC84856, ZNF37BP, ZNF33B...             |

This is an intermediate report and not a final signed off report

| Chr   | Start-Stop(bp)     | Size(kb) | Cytoband       | #Probes | Amp/Gain/<br>Loss/Del | P-value   | Annotations                        |
|-------|--------------------|----------|----------------|---------|-----------------------|-----------|------------------------------------|
| chr10 | 87892105-135234843 | 47,343   | q23.1 - q26.3  | 972     | -0.468740             | 4.90E-324 | GRID1, MIR346, WAPAL...            |
| chr12 | 230421-22695049    | 22,465   | p13.33 - p12.1 | 520     | -0.475779             | 1.62E-267 | IQSEC3, LOC574538, SLC6A12...      |
| chr13 | 19296544-89960396  | 70,664   | q11 - q31.2    | 1206    | -0.468881             | 4.90E-324 | LOC284232, LOC348021, PHF2P1...    |
| chr13 | 81137986-81454116  | 316      | q31.1          | 5       | 2.446169              | 1.76E-97  |                                    |
| chr13 | 90457836-92416896  | 1,959    | q31.3          | 34      | 2.336517              | 4.90E-324 | MIR622, LOC144776, MIR17HG...      |
| chr13 | 92494334-92892587  | 398      | q31.3          | 11      | -0.791542             | 2.24E-16  | GPC5                               |
| chr13 | 92973314-93309763  | 336      | q31.3          | 9       | 2.576738              | 5.31E-138 | GPC5                               |
| chr13 | 93879390-93989566  | 110      | q31.3          | 4       | 2.601232              | 9.06E-61  | GPC6                               |
| chr13 | 94035921-114946264 | 20,910   | q31.3 - q34    | 440     | -0.434579             | 3.32E-191 | GPC6, DCT, TGDS...                 |
| chr14 | 20472548-107258824 | 86,786   | q11.2 - q32.33 | 1726    | -0.432687             | 4.90E-324 | OR4K14, OR4K13, OR4L1...           |
| chr15 | 20481702-26191904  | 5,710    | q11.1 - q12    | 68      | -0.259966             | 1.66E-12  | HERC2P3, GOLGA6L6, GOLGA8C...      |
| chr15 | 49834437-102465355 | 52,631   | q21.2 - q26.3  | 1148    | 0.366844              | 4.90E-324 | C15orf33, DTWD1, ATP8B4...         |
| chr16 | 77549380-77789804  | 240      | q23.1          | 4       | -1.019041             | 1.09E-10  | NUDT7                              |
| chr16 | 78283614-86053065  | 7,769    | q23.1 - q24.1  | 173     | 0.349224              | 8.17E-51  | WWOX, MAF, DYNLRB2...              |
| chr16 | 88653937-88810033  | 156      | q24.2 - q24.3  | 11      | 0.606487              | 2.95E-11  | ZC3H18, IL17C, CYBA...             |
| chr17 | 148092-3962522     | 3,814    | p13.3 - p13.2  | 120     | -0.457988             | 4.82E-60  | RPH3AL, C17orf97, FAM101B...       |
| chr17 | 6913780-7367196    | 453      | p13.1          | 31      | -0.353722             | 7.32E-11  | ALOX12, RNASEK, RNASEK-C17ORF49... |
| chr17 | 9739759-10049224   | 309      | p13.1          | 16      | -0.584165             | 1.41E-14  | GLP2R, RCVRN, GAS7                 |
| chr17 | 10127678-12608962  | 2,481    | p13.1 - p12    | 46      | 0.357461              | 1.49E-15  | MYH13, MYH8, MYH4...               |
| chr17 | 12759033-14013054  | 1,254    | p12            | 22      | -0.691451             | 8.56E-26  | ARHGAP44, ELAC2, HS3ST3A1...       |
| chr17 | 14569547-19959014  | 5,389    | p12 - p11.2    | 131     | 0.342193              | 2.19E-37  | CDRT7, PMP22, TEK3...              |
| chr17 | 20141913-22078577  | 1,937    | p11.2          | 28      | -0.560215             | 1.70E-21  | SPECC1, CCDC144C, LGALS9B...       |

This is an intermediate report and not a final signed off report

| Chr   | Start-Stop(bp)      | Size(kb) | Cytoband        | #Probes | Amp/Gain/<br>Loss/Del | P-value   | Annotations                     |
|-------|---------------------|----------|-----------------|---------|-----------------------|-----------|---------------------------------|
| chr17 | 25590352-25954807   | 364      | q11.1 - q11.2   | 10      | 0.687910              | 7.19E-13  | WSB1, LOC440419, KSR1           |
| chr17 | 26883246-27926708   | 1,043    | q11.2           | 45      | 0.767973              | 1.90E-63  | PIGS, ALDOC, SPAG5...           |
| chr18 | 142096-10855438     | 10,713   | p11.32 - p11.22 | 200     | 0.323401              | 1.88E-50  | USP14, THOC1, COLEC12...        |
| chr18 | 7438812-8015690     | 577      | p11.23          | 13      | -0.269840             | 1.68E-12  | PTPRM                           |
| chr18 | 19506073-27890123   | 8,384    | q11.2 - q12.1   | 129     | 0.746234              | 1.74E-167 | GATA6, CTAGE1, RBBP8...         |
| chr18 | 22400125-22934634   | 535      | q11.2           | 10      | 1.368583              | 7.54E-11  | ZNF521                          |
| chr18 | 39537606-77982126   | 38,445   | q12.3 - q23     | 639     | -0.504090             | 4.90E-324 | PIK3C3, RIT2, SYT4...           |
| chr20 | 121521-26128919     | 26,007   | p13 - p11.1     | 487     | -0.475429             | 6.28E-254 | DEFB126, DEFB127, DEFB128...    |
| chr20 | 50788962-62872839   | 12,084   | q13.2 - q13.33  | 264     | -0.477664             | 1.12E-140 | ZFP64, TSHZ2, ZNF217...         |
| chr21 | 25203765-48018909   | 22,815   | q21.2 - q22.3   | 545     | 0.384308              | 5.96E-187 | NCRNA00158, MIR155HG, MIR155... |
| chr22 | 17096855-17407203   | 310      | q11.1           | 6       | 1.202907              | 4.29E-22  | psiTPTE22, XKR3, HSFY1P1        |
| chr22 | 18953012-23627391   | 4,674    | q11.21 - q11.23 | 124     | 2.065511              | 4.90E-324 | DGCR5, DGCR9, DGCR10...         |
| chr22 | 22998284-23627391   | 629      | q11.22 - q11.23 | 18      | 2.755399              | 1.96E-17  | MIR650, IGLL5, RTDR1...         |
| chr22 | 23739437-51178264   | 27,439   | q11.23 - q13.33 | 738     | -0.420082             | 1.42E-301 | ZDHC8P1, IGLL1, C22orf43...     |
| chrX  | 61091-2608349       | 2,547    | p22.33          | 91      | -0.344257             | 1.16E-26  | PLCXD1, GTPBP6, NCRNA00107...   |
| chrX  | 2709027-58051765    | 55,343   | p22.33 - p11.21 | 989     | 0.338837              | 2.26E-256 | XG, GYG2, ARSD...               |
| chrX  | 62645308-154664396  | 92,019   | q11.1 - q28     | 1573    | 0.339561              | 4.90E-324 | LOC92249, ARHGEF9, MIR1468...   |
| chrX  | 112926208-114305500 | 1,379    | q23             | 26      | 0.903381              | 8.78E-21  | HTR2C, SNORA35, MIR764...       |
| chrY  | 11091-2558349       | 2,547    | p11.32 - p11.31 | 91      | -0.344257             | 1.16E-26  | PLCXD1, GTPBP6, NCRNA00107...   |
| chrY  | 2694871-9901314     | 7,206    | p11.31 - p11.2  | 58      | -1.860709             | 2.39E-273 | RPS4Y1, ZFY, TGIF2LY...         |
| chrY  | 9042367-9148336     | 106      | p11.2           | 3       | -0.585518             | 4.08E-11  |                                 |
| chrY  | 14061053-28767604   | 14,707   | q11.21 - q11.23 | 144     | -1.343495             | 4.90E-324 | GYG2P1, TTTY15, USP9Y...        |
| chrY  | 14061053-14463950   | 403      | q11.21          | 7       | -2.786670             | 3.11E-18  |                                 |
| chrY  | 15206937-15977687   | 771      | q11.221         | 15      | -2.141166             | 8.54E-15  | UTY, TMSB4Y                     |

This is an intermediate report and not a final signed off report

| Chr  | Start-Stop(bp)    | Size(kb) | Cytoband | #Probes | Amp/Gain/<br>Loss/Del | P-value  | Annotations                   |
|------|-------------------|----------|----------|---------|-----------------------|----------|-------------------------------|
| chrY | 16393891-16640171 | 246      | q11.221  | 4       | -0.328297             | 1.95E-11 | NLGN4Y                        |
| chrY | 17890214-18255512 | 365      | q11.221  | 5       | -2.590785             | 3.21E-10 |                               |
| chrY | 18574255-19291733 | 717      | q11.221  | 9       | -0.497090             | 8.28E-17 |                               |
| chrY | 21491899-21843986 | 352      | q11.222  | 6       | -2.877162             | 5.38E-14 | BCORP1, CYorf15A,<br>CYorf15B |

Amp=Amplification Del=Deletion

Total Amp/Gain/Loss/Del Intervals: 92

This is an intermediate report and not a final signed off report

## Analysis Settings

|                                  |                                                                                                                                                               |                             |                                                                                                                                                                                                                                                                                                                                                                                                                                                                                                                                                                                                                                                               |
|----------------------------------|---------------------------------------------------------------------------------------------------------------------------------------------------------------|-----------------------------|---------------------------------------------------------------------------------------------------------------------------------------------------------------------------------------------------------------------------------------------------------------------------------------------------------------------------------------------------------------------------------------------------------------------------------------------------------------------------------------------------------------------------------------------------------------------------------------------------------------------------------------------------------------|
| Design                           | : 021924_20101001                                                                                                                                             | Sample Name                 | : 252192435816_2_3                                                                                                                                                                                                                                                                                                                                                                                                                                                                                                                                                                                                                                            |
| Genome                           | : hg19                                                                                                                                                        | Aberration Algorithm        | : ADM-2                                                                                                                                                                                                                                                                                                                                                                                                                                                                                                                                                                                                                                                       |
| Threshold                        | : 6.0                                                                                                                                                         | Fuzzy Zero                  | : OFF                                                                                                                                                                                                                                                                                                                                                                                                                                                                                                                                                                                                                                                         |
| GC Correction                    | : ON                                                                                                                                                          | Window Size                 | : 2Kb                                                                                                                                                                                                                                                                                                                                                                                                                                                                                                                                                                                                                                                         |
| Centralization (legacy)          | : OFF                                                                                                                                                         | Diploid Peak Centralization | : ON                                                                                                                                                                                                                                                                                                                                                                                                                                                                                                                                                                                                                                                          |
| SNP Copy Number                  | : OFF                                                                                                                                                         | LOH                         | : OFF                                                                                                                                                                                                                                                                                                                                                                                                                                                                                                                                                                                                                                                         |
| Combine Replicates (Intra Array) | : ON                                                                                                                                                          | Array Level Filter          | : NONE                                                                                                                                                                                                                                                                                                                                                                                                                                                                                                                                                                                                                                                        |
| Metric Set Filter                | : NONE                                                                                                                                                        | Aberration Filter           | : Minimum Number of Probes for Amplification >= 3 AND Nesting Level <= 100 AND Minimum Avg. Absolute Log Ratio for Amplification >= 0.25 AND Minimum Size (Kb) of Region for Amplification >= 0.0 AND Minimum Size (Kb) of Region for Deletion >= 0.0 AND Minimum Number of Probes for Deletion >= 3 AND Minimum Avg. Absolute Log Ratio for Deletion >= 0.25 AND Minimum Number of Probes for Gain >= 3 AND Minimum Number of Probes for Loss >= 3 AND Minimum Avg. Absolute Log Ratio for Gain >= 0.25 AND Minimum Avg. Absolute Log Ratio for Loss >= 0.25 AND Minimum Size (Kb) of Region for Gain >= 0.0 AND Minimum Size (Kb) of Region for Loss >= 0.0 |
| Feature Level Filter             | : gIsSaturated = true OR<br>rlsSaturated = true OR<br>gIsFeatNonUnifOL = true OR<br>rlsFeatNonUnifOL = true OR<br>LogRatio = 0; Include matching values=false | Design Level Filter         | : Homology = 0 OR<br>IsPseudoautosomal = 1                                                                                                                                                                                                                                                                                                                                                                                                                                                                                                                                                                                                                    |
| LOH Filter                       | : NONE                                                                                                                                                        | Genomic Boundary            | : OFF                                                                                                                                                                                                                                                                                                                                                                                                                                                                                                                                                                                                                                                         |
| Show Flat Intervals              | : false                                                                                                                                                       | Template Name               | : Default Cyto Report Template - CGH                                                                                                                                                                                                                                                                                                                                                                                                                                                                                                                                                                                                                          |

**This is an intermediate report and not a final signed off report**

| Notes                            |                     |
|----------------------------------|---------------------|
| Sample Notes                     | No notes available. |
| Amp/Gain/Loss/Del Interval Notes | No notes available. |

This is an intermediate report and not a final signed off report
